# Supplementary material for: Total synthesis of Sceletium alkaloids (±)-joubertinamine, (±)-epijoubertinamine, (±)-tortuosamine and formal synthesis of (±)-mesembrine, (±)-N-formyltortuosamine
Source: Royal Society of Chemistry journal article supplement (doi:10.1039/c6nj00630b), 2016-01-01
Supplement: c6nj00630b1.pdf [file c6nj00630b1.pdf]

**Total Synthesis of *Scelletium* Alkaloids (±)-Joubertinamine, (±)-  
Epijoubertinamine, (±)-Tortuosamine and Formal Synthesis of (±)-Mesembrine,  
(±)-*N*-Formyltortuosamine**

Viraj A. Bhosale\*, Dattatraya U. Ukale and Suresh B. Waghmode\*

Garware Research Center, Department of Chemistry, Savitribai Phule Pune University (formerly  
Pune University of Pune), Ganeshkhind, Pune 411007, India

**Table of contents**

| <b>Description</b>                                                                         | <b>Page</b> |
|--------------------------------------------------------------------------------------------|-------------|
| <sup>1</sup> H and <sup>13</sup> CNMR spectra of compound (±)- <b>7b</b>                   | 2-3         |
| <sup>1</sup> H and <sup>13</sup> CNMR spectra of compound(±)- <b>8</b>                     | 4-5         |
| <sup>1</sup> H and <sup>13</sup> CNMR spectra of compound(±)- <b>9</b>                     | 6-7         |
| <sup>1</sup> H and <sup>13</sup> CNMR spectra of compound (±)- <b>10a</b>                  | 8-9         |
| <sup>1</sup> H and <sup>13</sup> CNMR spectra of compound(±)- <b>10b</b>                   | 10-11       |
| <sup>1</sup> H and <sup>13</sup> CNMR spectra of (±)-joubertinamine <b>1a</b>              | 12-13       |
| <sup>1</sup> H and <sup>13</sup> CNMR spectra of (±)-epijoubertinamine <b>1b</b>           | 14-15       |
| <sup>1</sup> H and <sup>13</sup> CNMR spectra of compound(±)- <b>11</b>                    | 16-17       |
| <sup>1</sup> H and <sup>13</sup> CNMR spectra of compound(±)- <b>13</b>                    | 18-19       |
| <sup>1</sup> H and <sup>13</sup> CNMR spectra of compound (±)- <b>14</b>                   | 20-21       |
| <sup>1</sup> H and <sup>13</sup> CNMR spectra of compound (±) <b>15</b>                    | 22-23       |
| <sup>1</sup> H and <sup>13</sup> CNMR spectra of compound (±)- <b>16</b>                   | 24-25       |
| <sup>1</sup> H and <sup>13</sup> CNMR spectra of (±)-tortuosamine- <b>3a</b>               | 26-27       |
| Fig. 4 Dihedral angles of diastereomers <b>10a'</b> obtained after the optimization by DFT | 28          |
| Fig. 1 DFT optimized structure of most stable <b>10a'</b>                                  | 29          |
| Table 1. Coordinates of <b>10b</b> optimized structure by DFT                              | 30          |

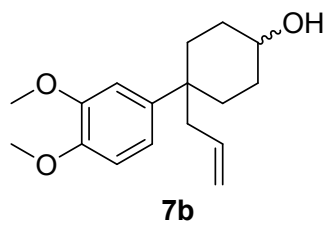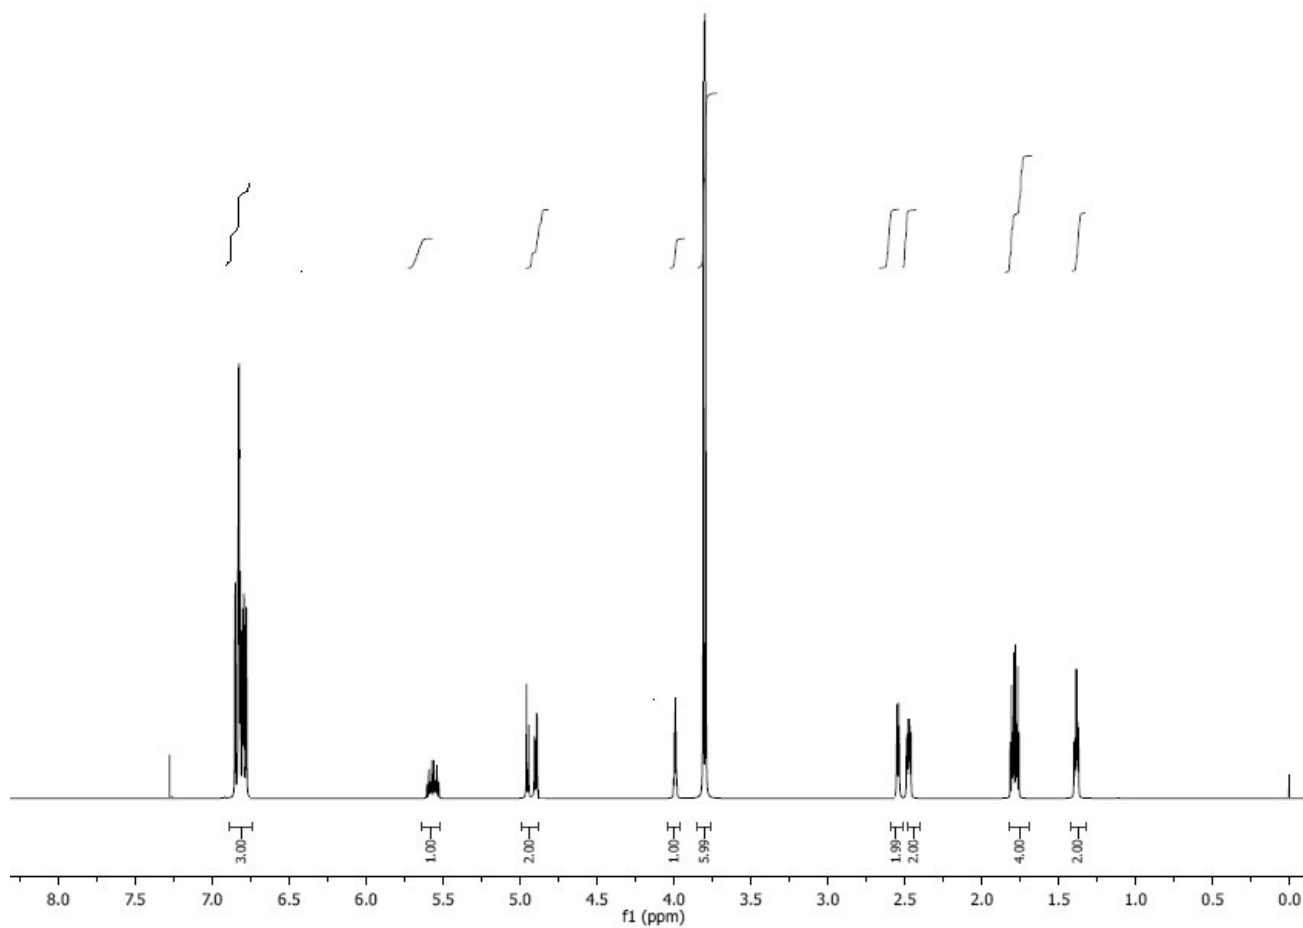

$^1\text{H}$  NMR of ( $\pm$ )-**7b** (500 MHz,  $\text{CDCl}_3$ )

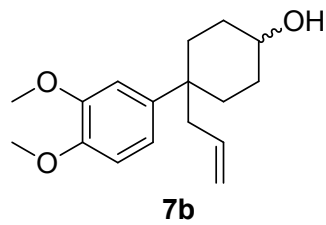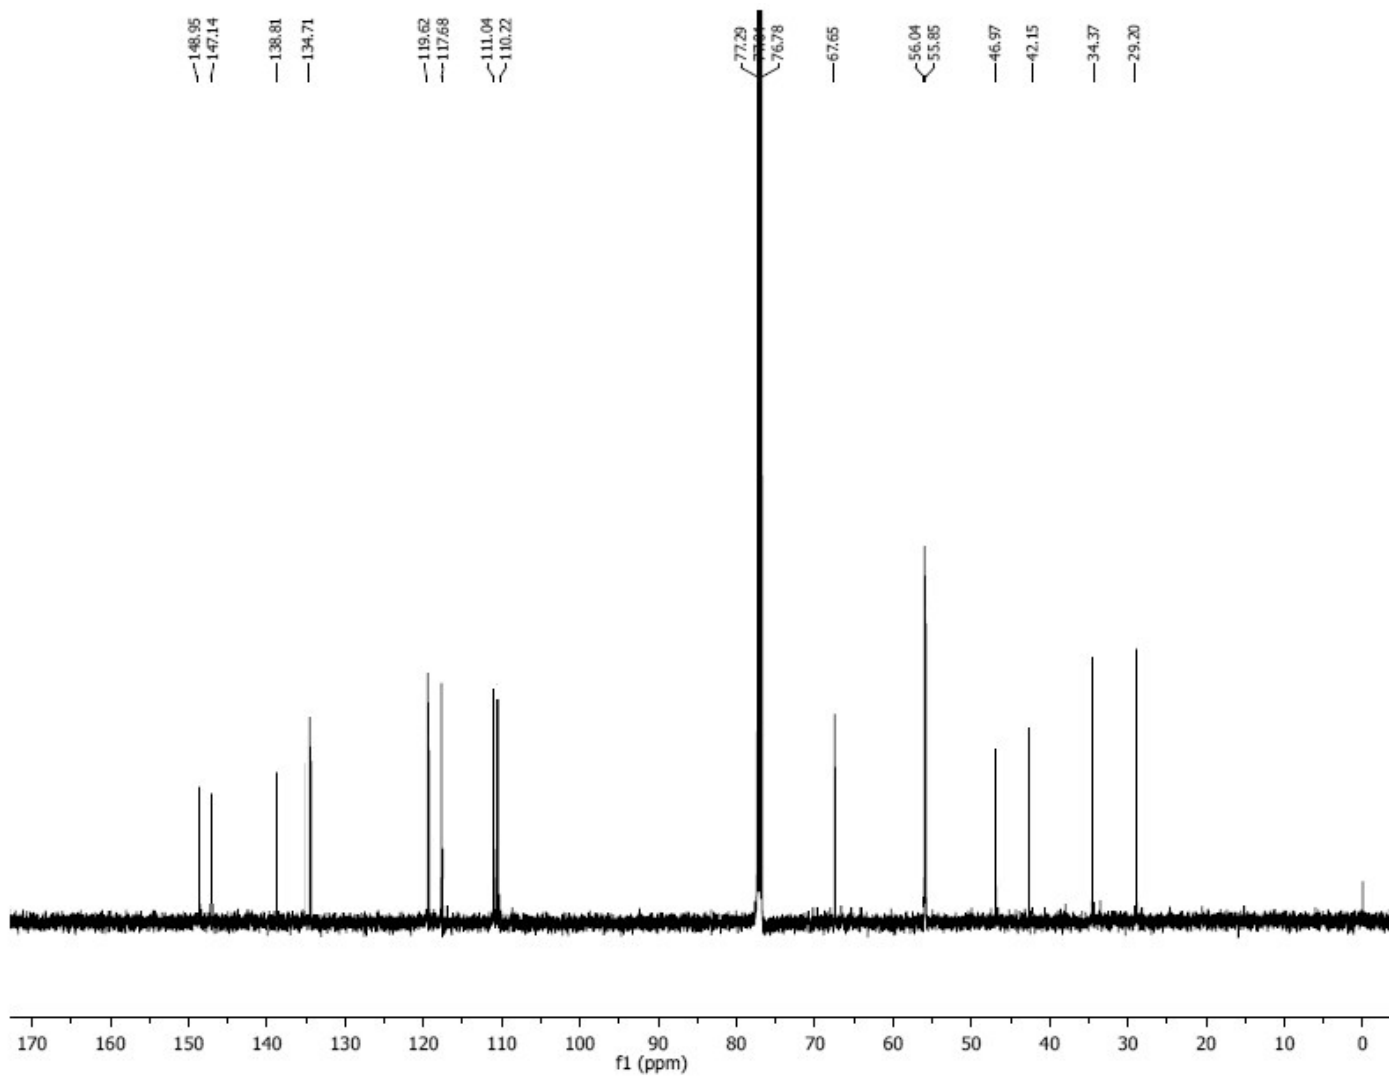

$^{13}\text{C}$  NMR of ( $\pm$ )-**7b** (126 MHz,  $\text{CDCl}_3$ )

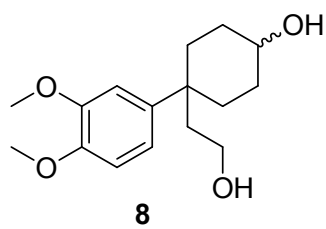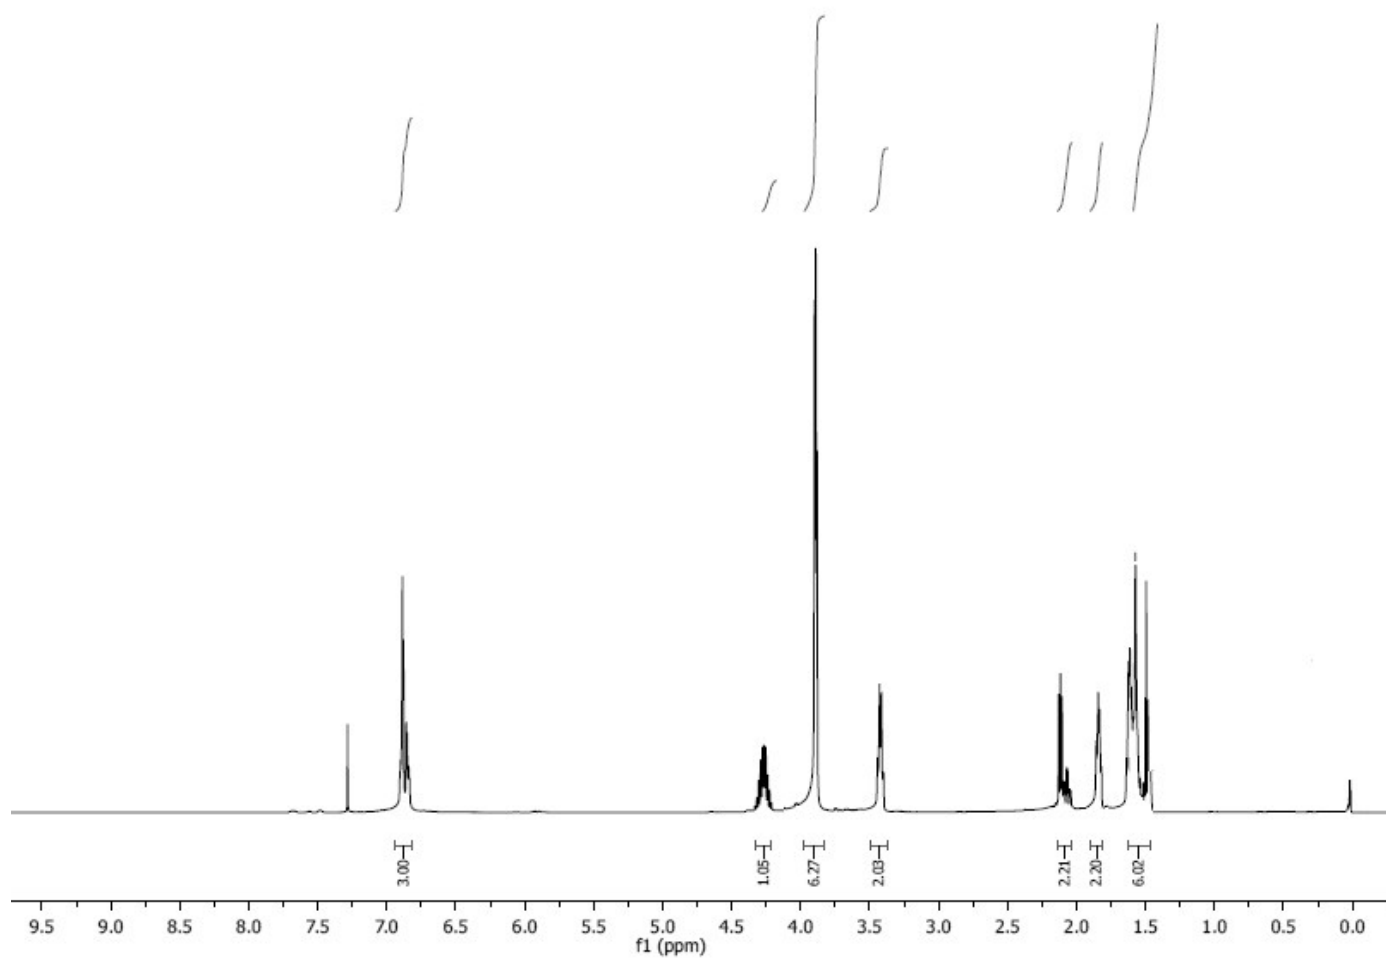

$^1\text{H}$  NMR of ( $\pm$ )-**8** (500 MHz,  $\text{CDCl}_3$ )

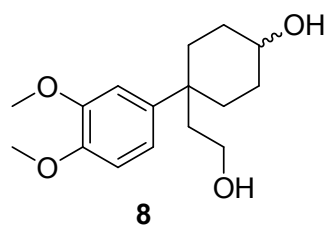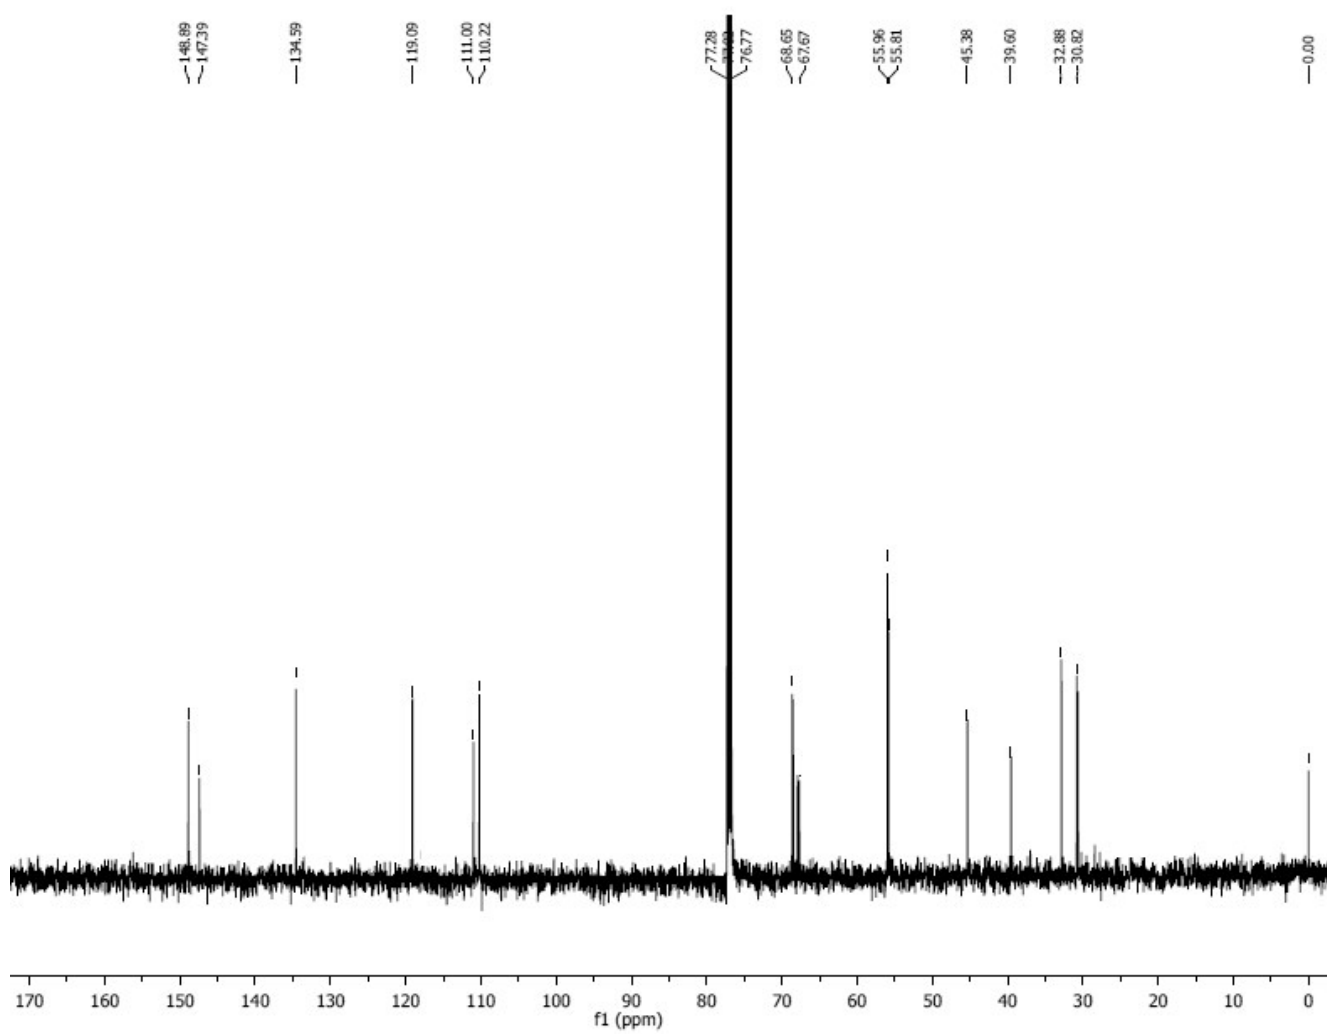

**<sup>13</sup>C NMR of (±)-8 (126MHz, CDCl<sub>3</sub>)**

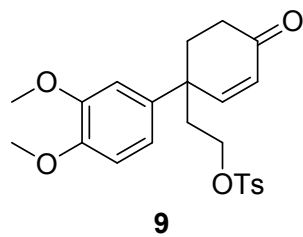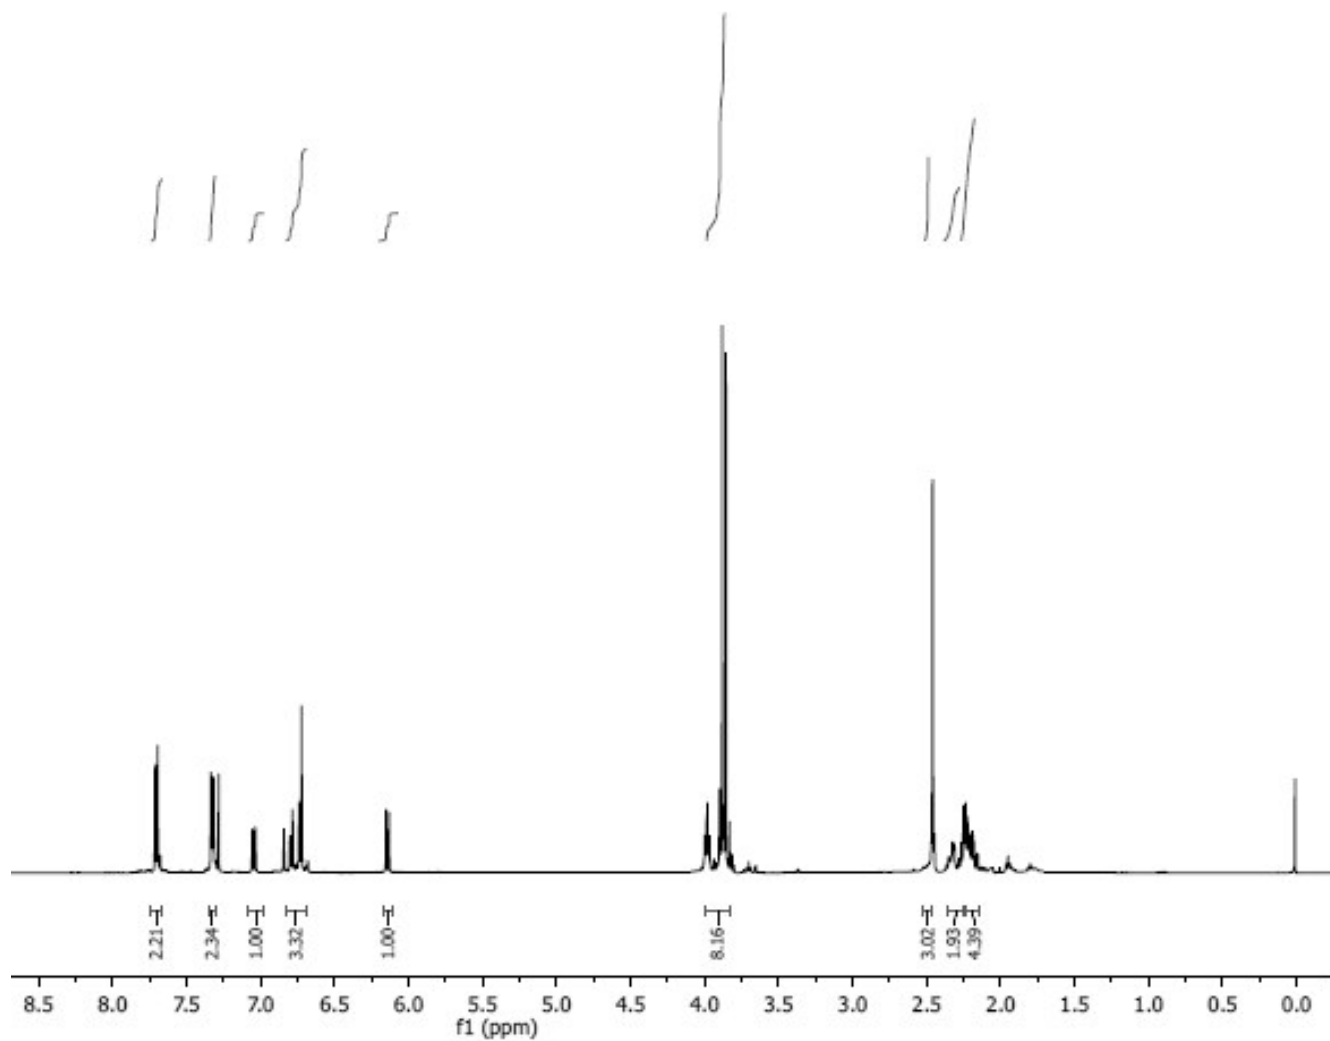

**$^1\text{H}$  NMR of ( $\pm$ )-9 (500 MHz,  $\text{CDCl}_3$ )**

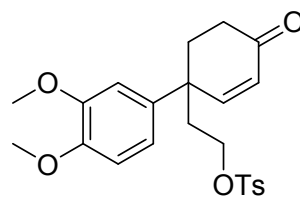

9

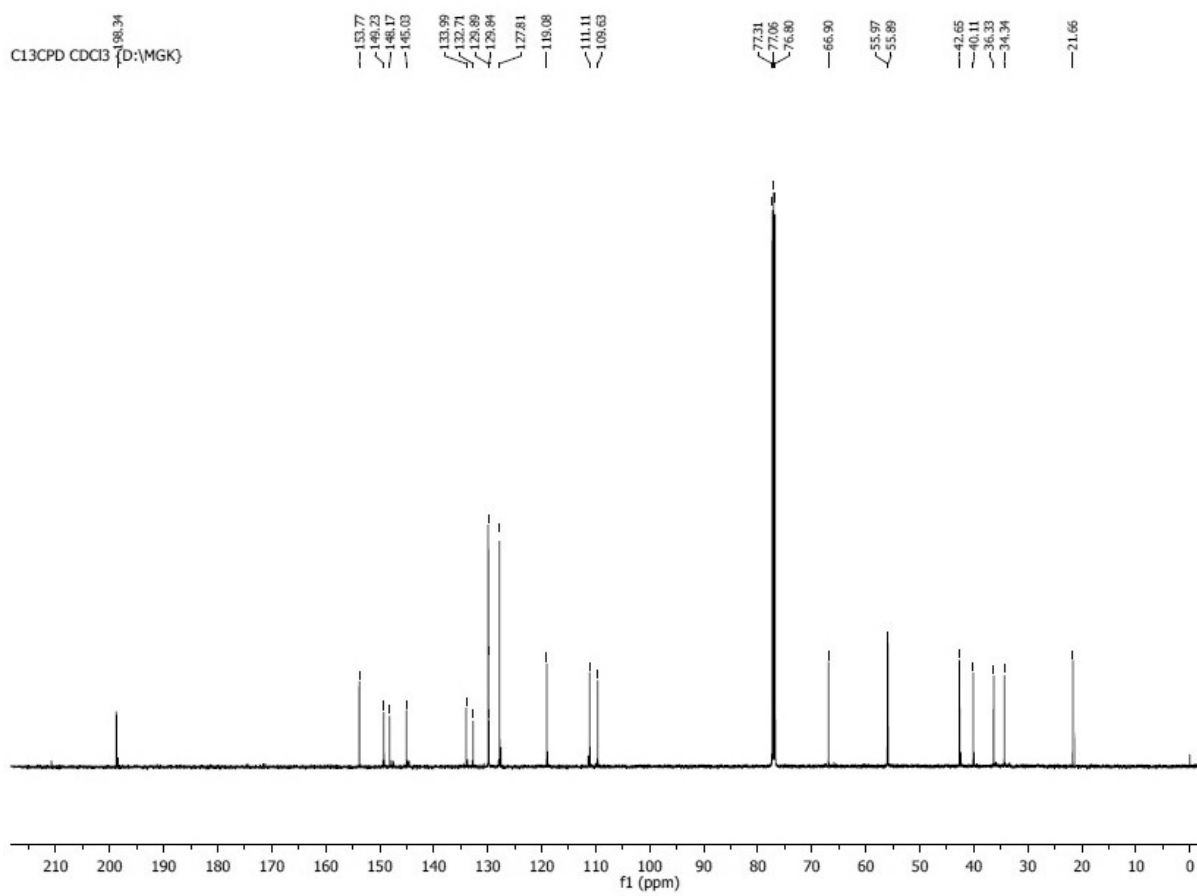

**<sup>13</sup>C NMR of (±)-9 (126MHz, CDCl<sub>3</sub>)**

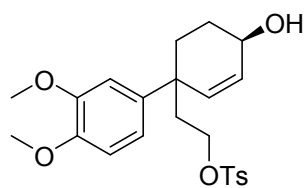

(±)-10a

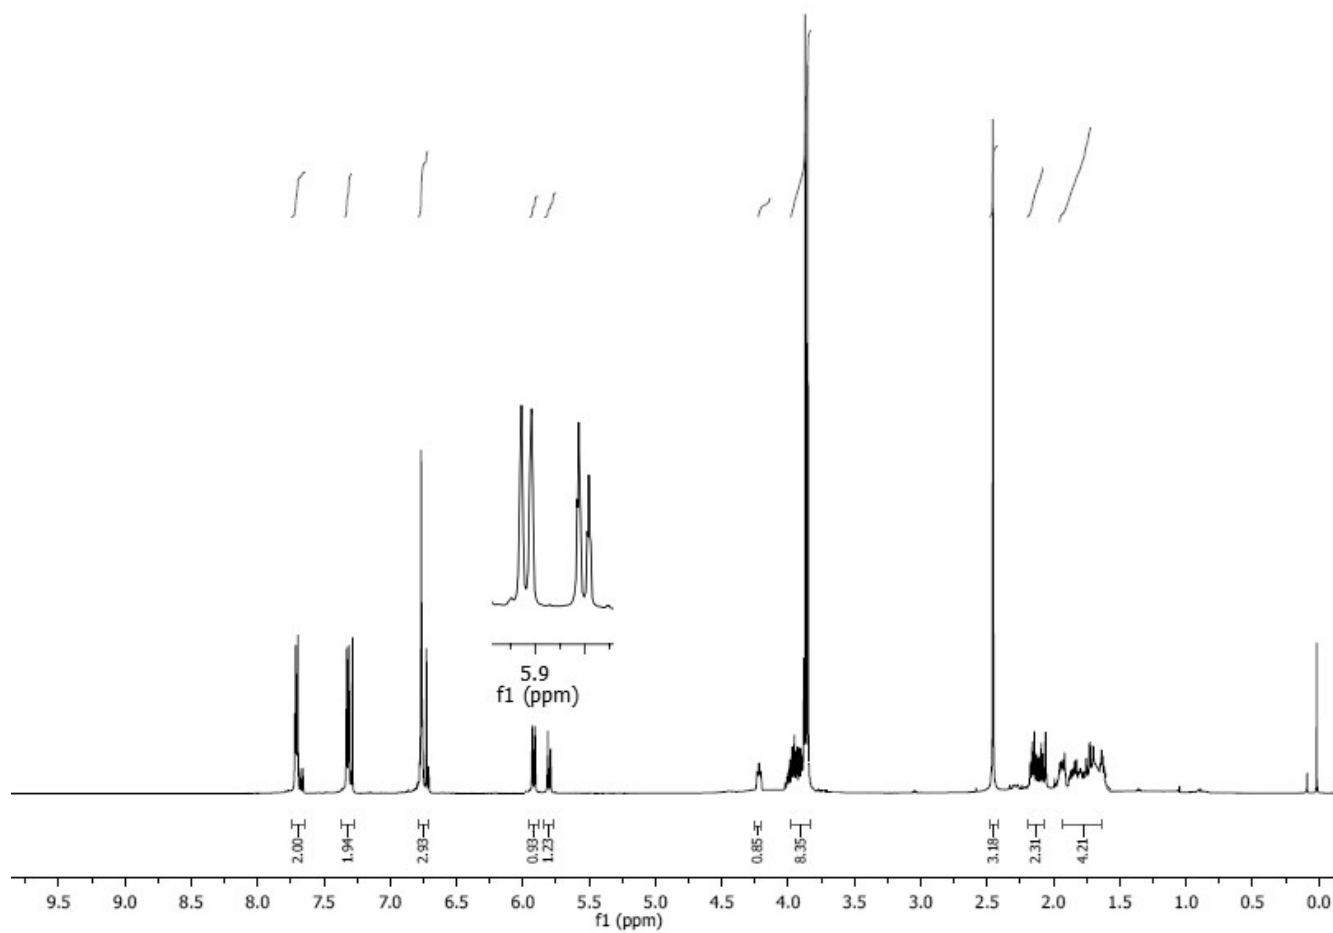

$^1\text{H}$  NMR of (±)-10a (500 MHz,  $\text{CDCl}_3$ )



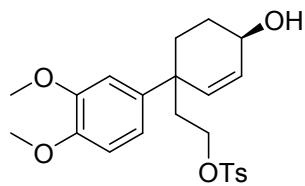

(±)-10a

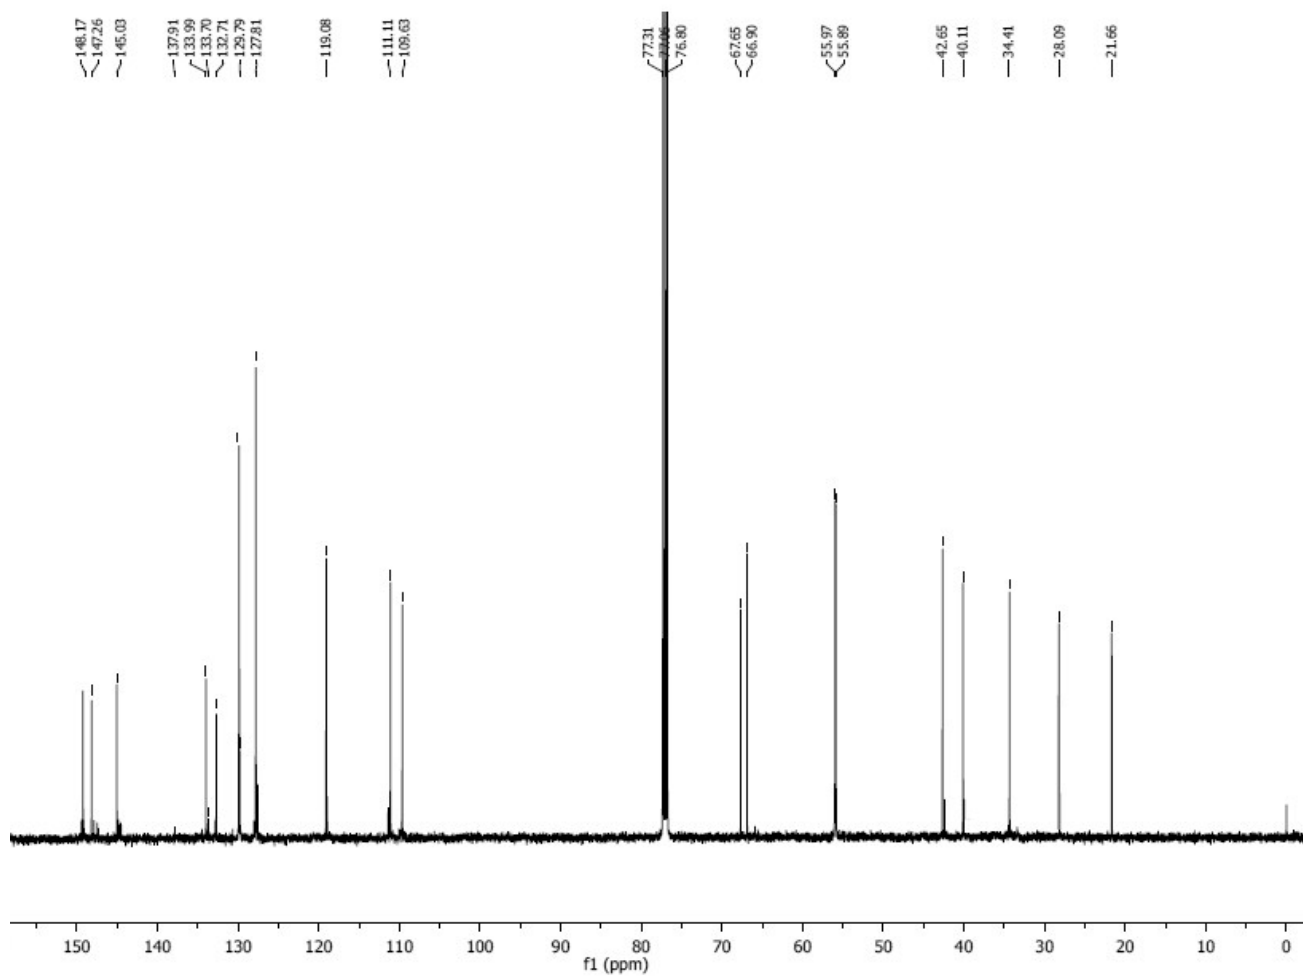

<sup>13</sup>C NMR of (±)-10a (126MHz, CDCl<sub>3</sub>)

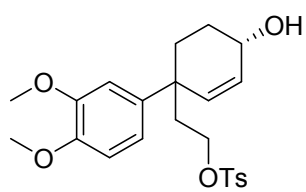

(±)-10b

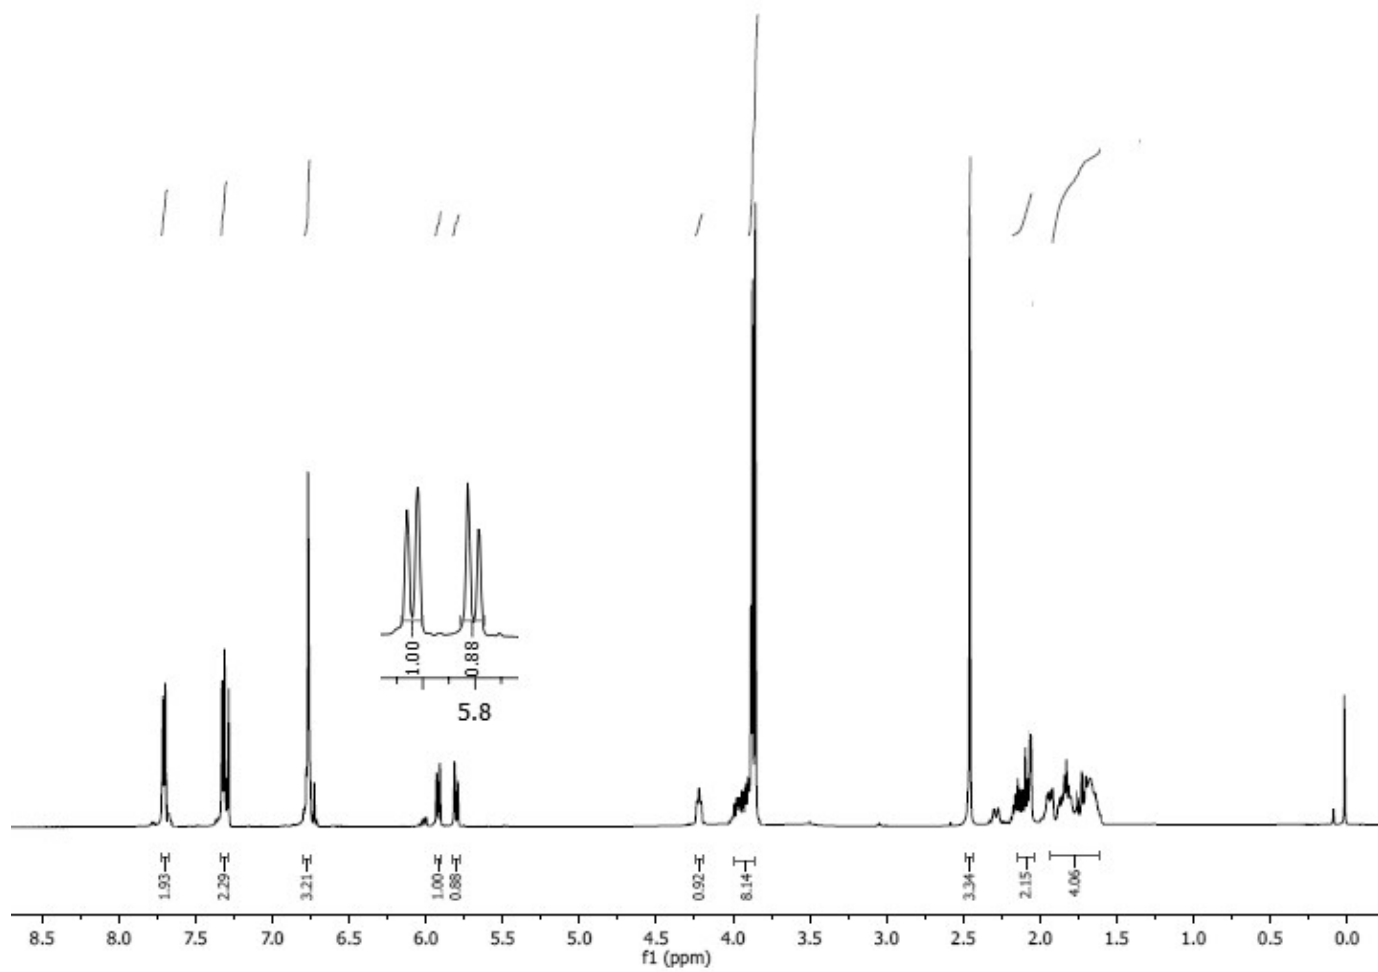

<sup>1</sup>H NMR of (±)-10b (500 MHz, CDCl<sub>3</sub>)

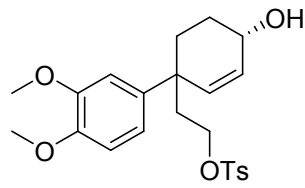

(±)-10b

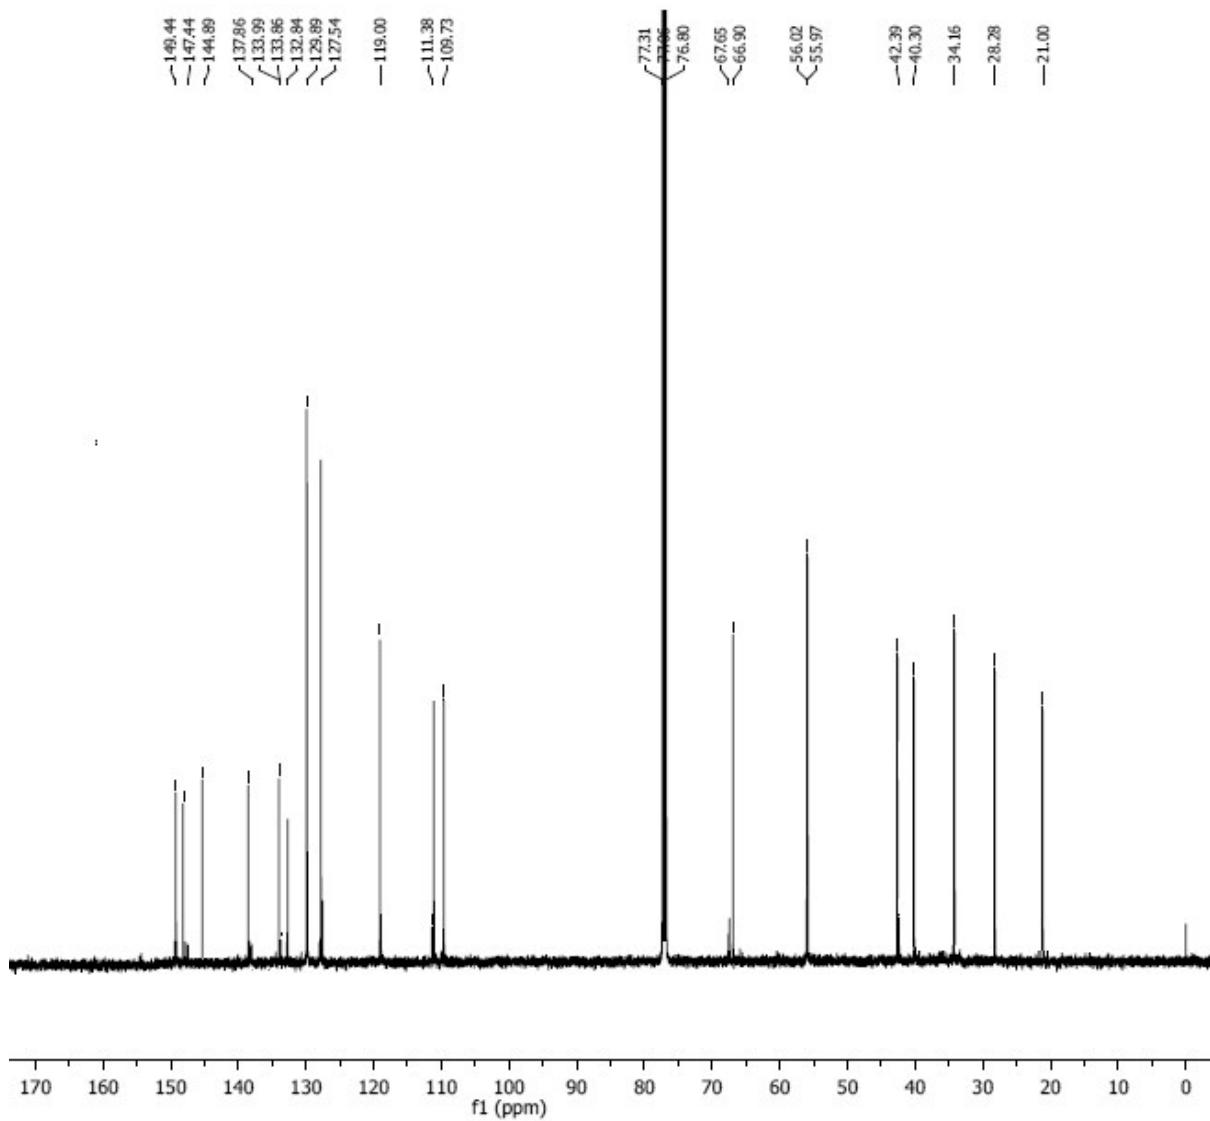

<sup>13</sup>C NMR of (±)-10b (126MHz, CDCl<sub>3</sub>)

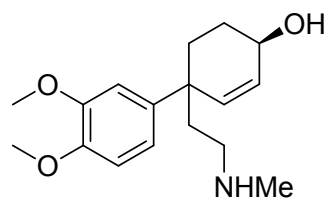

**1a**

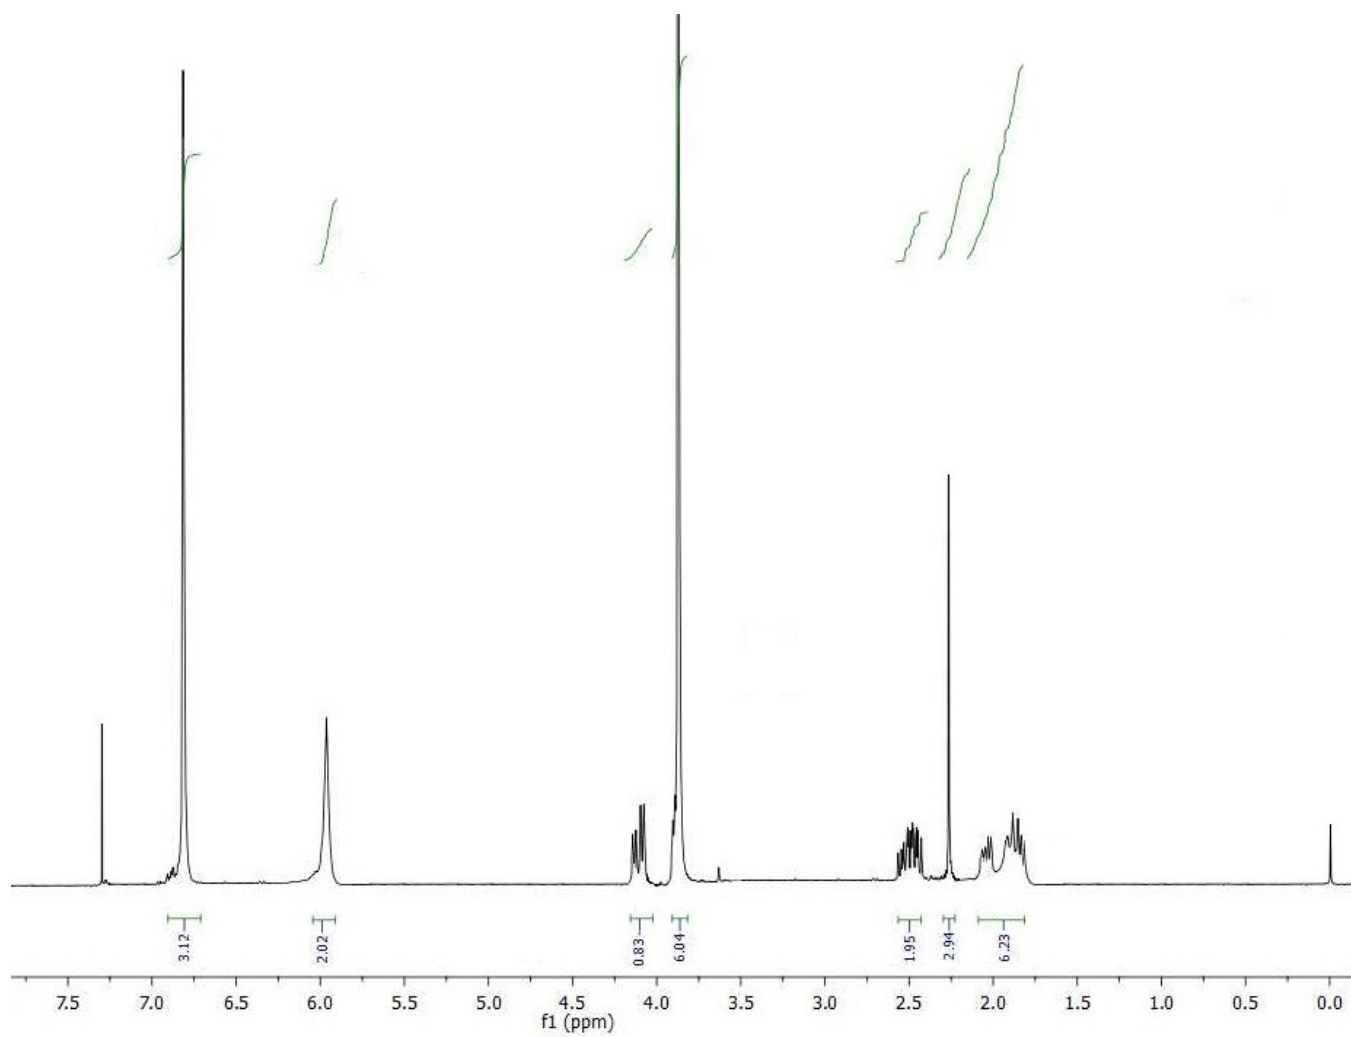

<sup>1</sup>H NMR of (±)-**1a** (500 MHz, CDCl<sub>3</sub>)

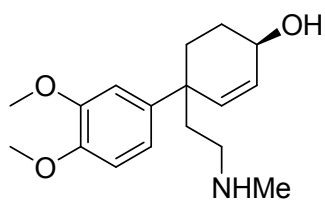

1a

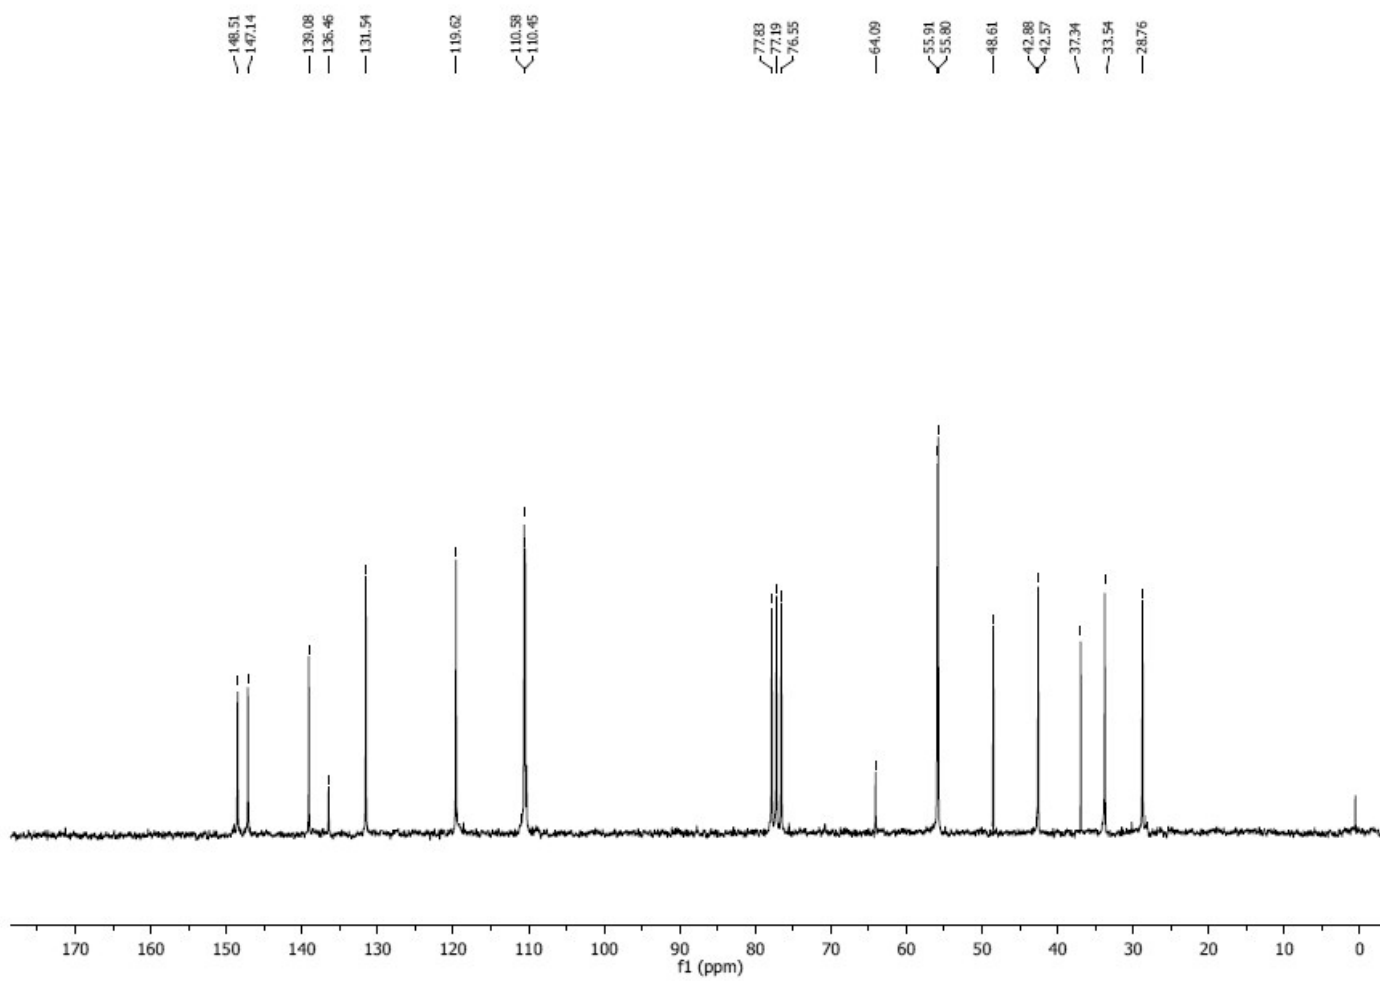

<sup>13</sup>C NMR of (±)-1a (126MHz, CDCl<sub>3</sub>)

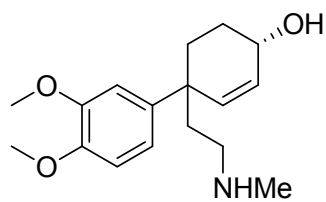

**1b**

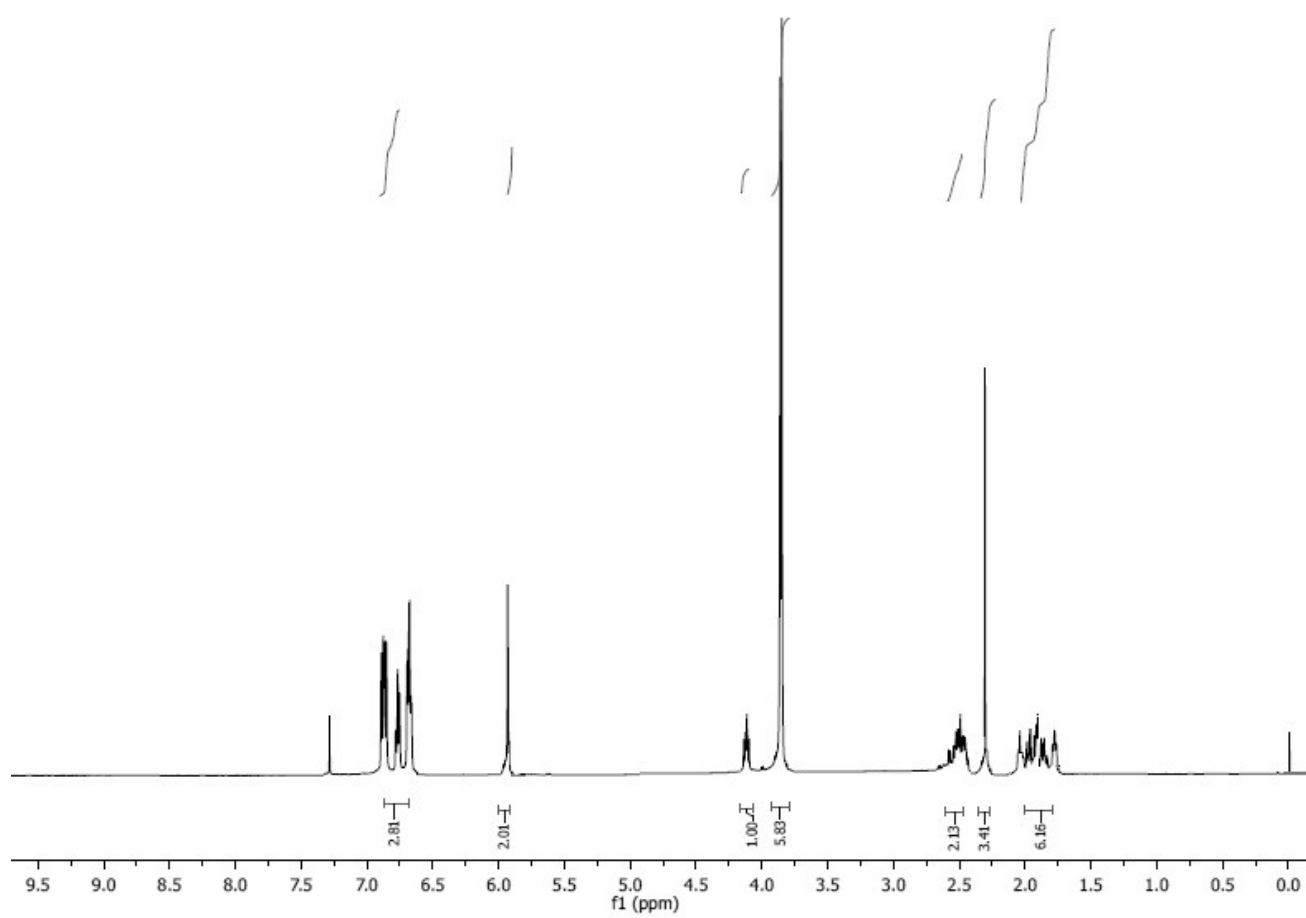

**<sup>1</sup>H NMR of (±)-1b (500 MHz, CDCl<sub>3</sub>)**

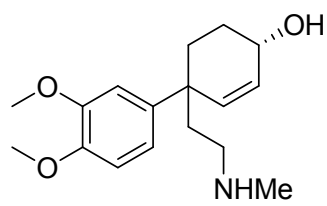

**1b**

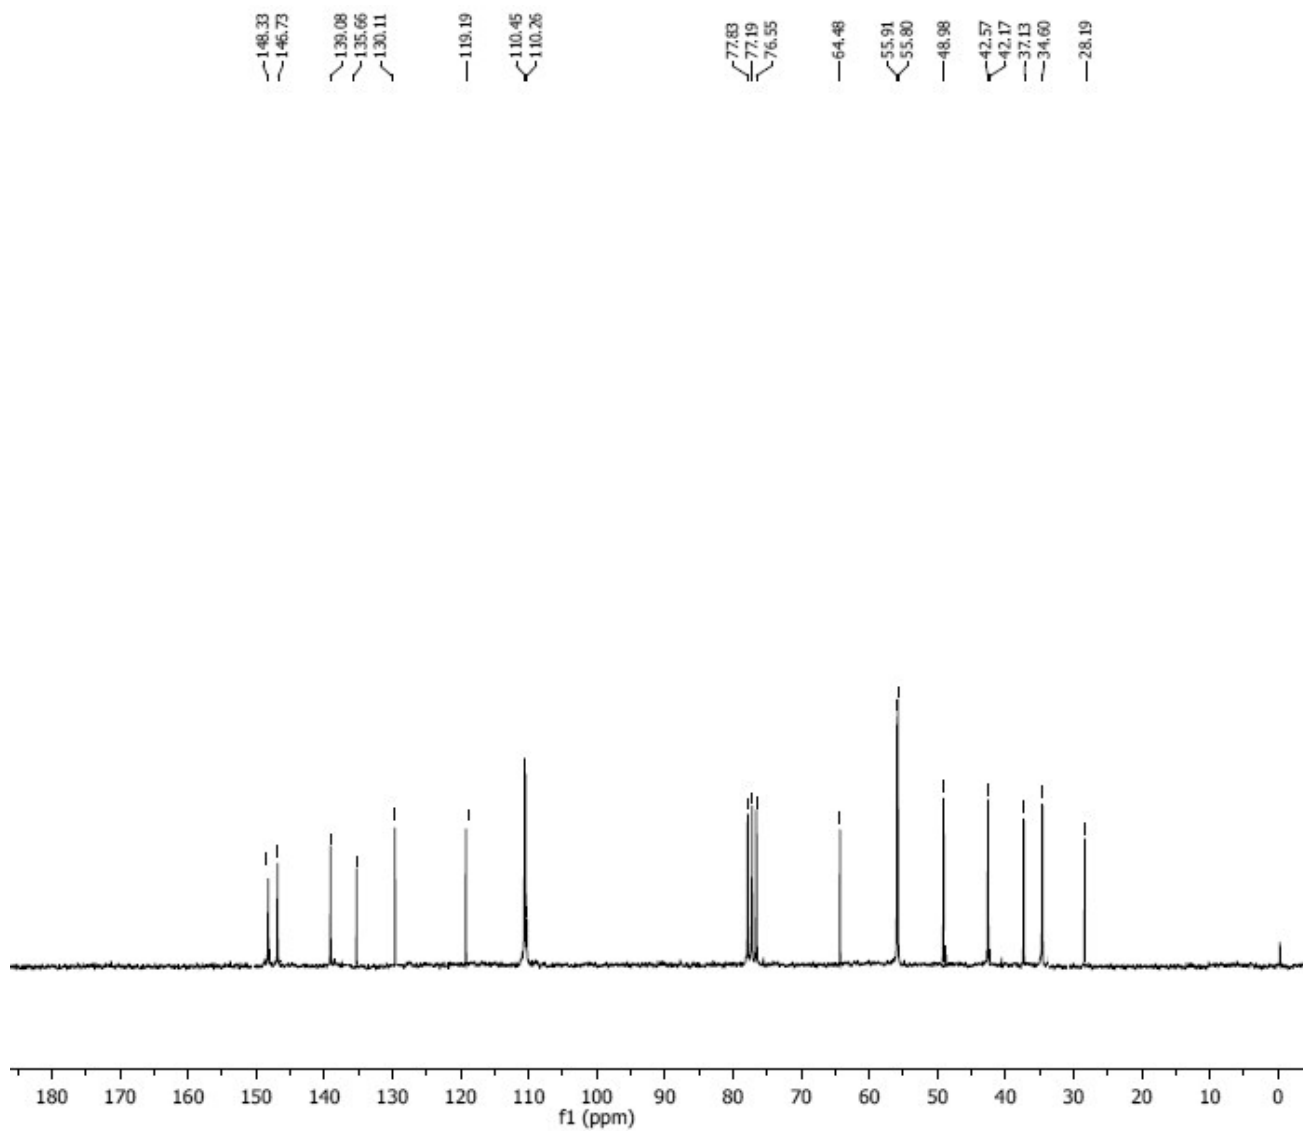

MR of (±)-**1b** (126MHz, CDCl<sub>3</sub>)

<sup>13</sup>CN

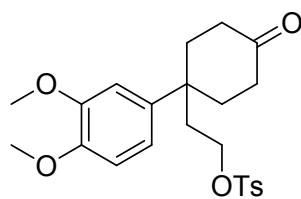

11

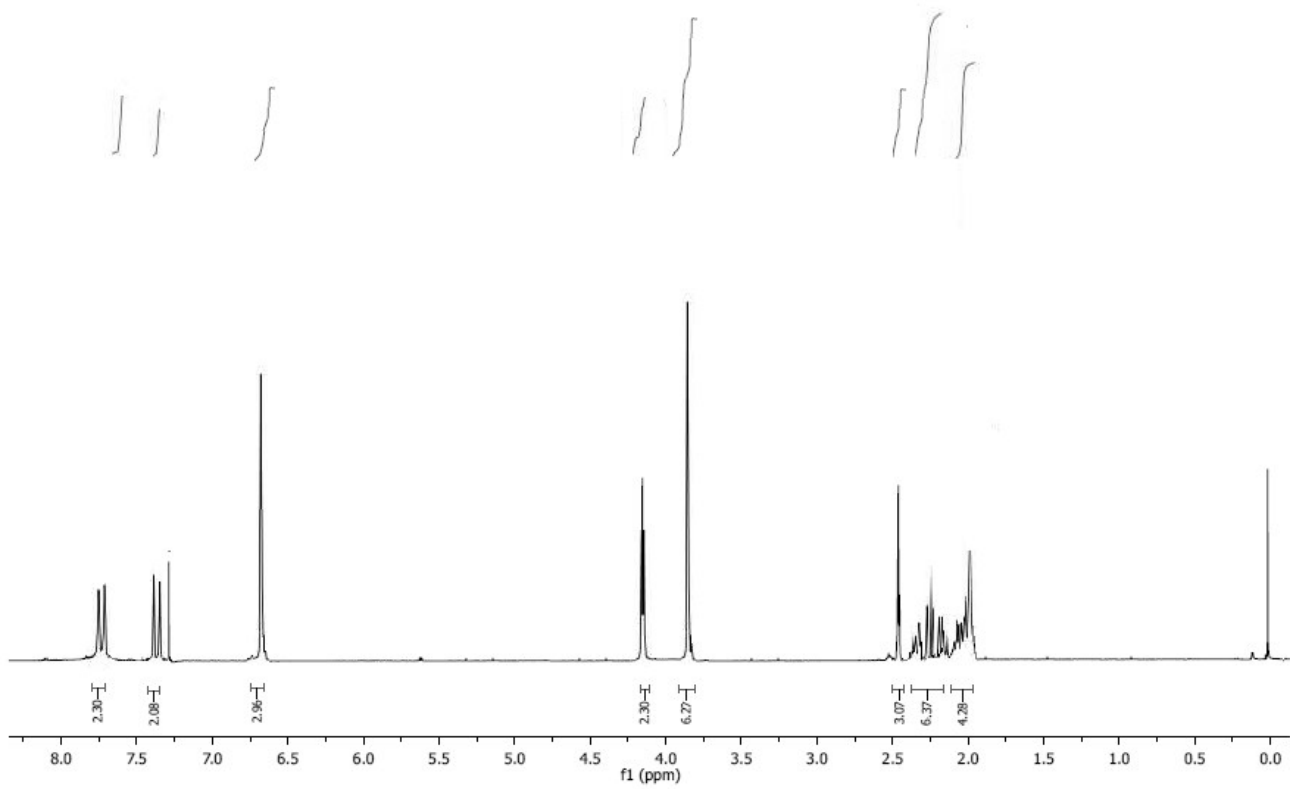

<sup>1</sup>H NMR of (±)-11 (500 MHz, CDCl<sub>3</sub>)



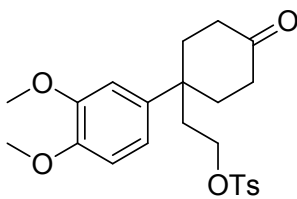

11

ex380g  
EX-38g  
C13CPD CDCl3 (D:\MGK)-root 6

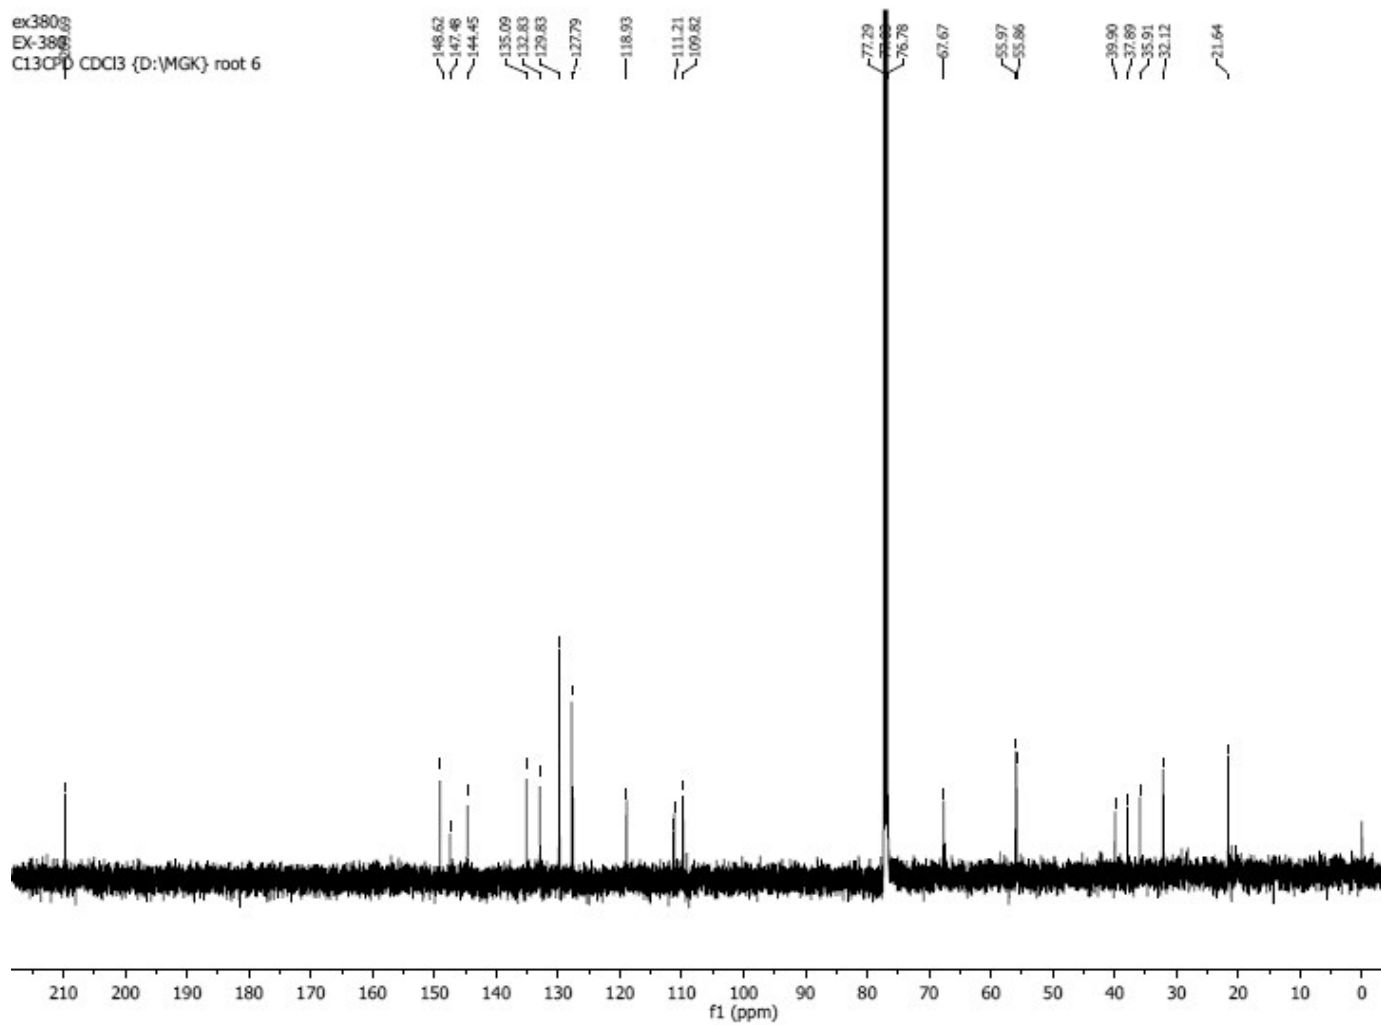

<sup>13</sup>CNMR of (±)-11 (126MHz, CDCl<sub>3</sub>)

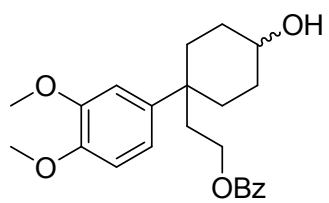

13

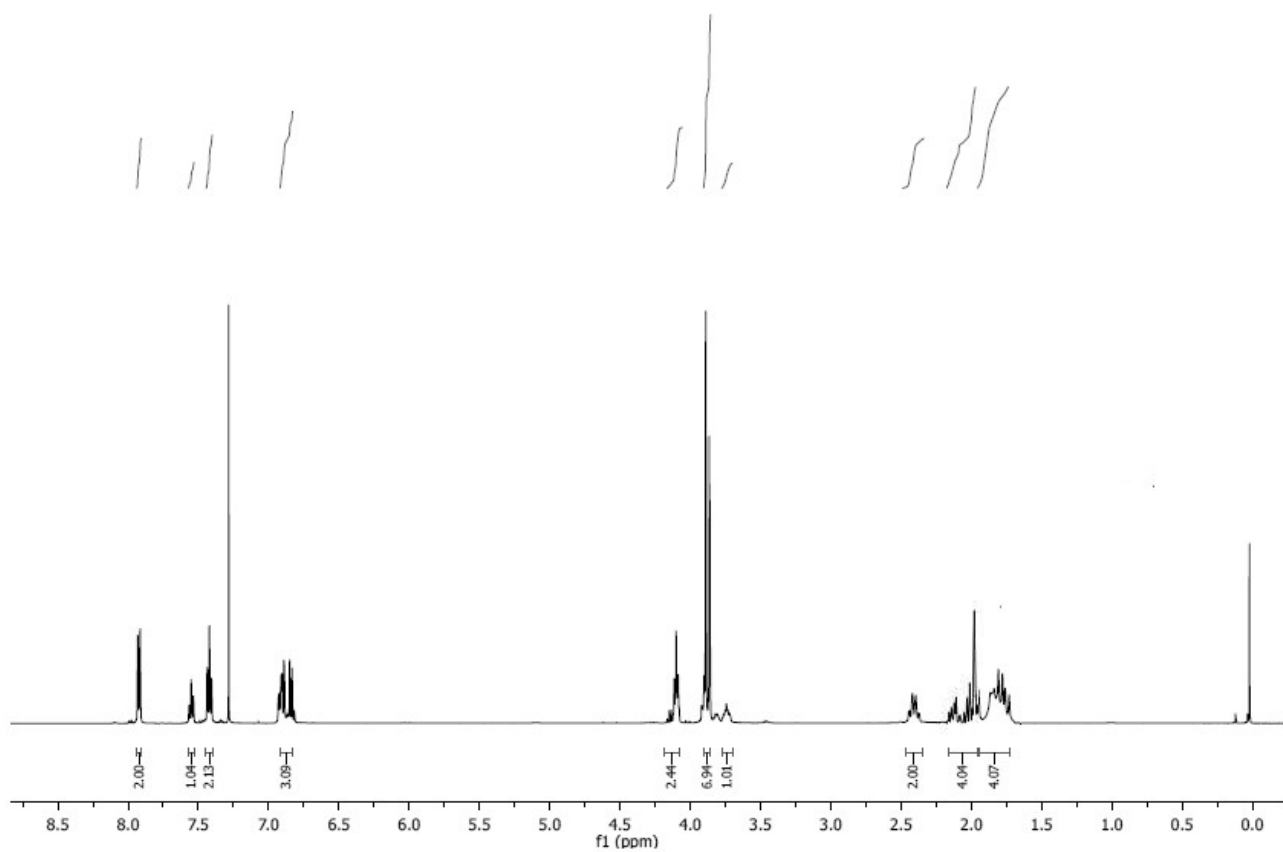

<sup>1</sup>H NMR of (±)-13 (500 MHz, CDCl<sub>3</sub>)

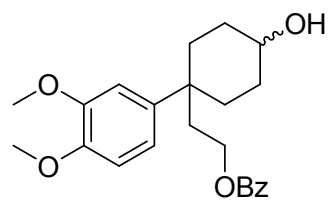

**13**

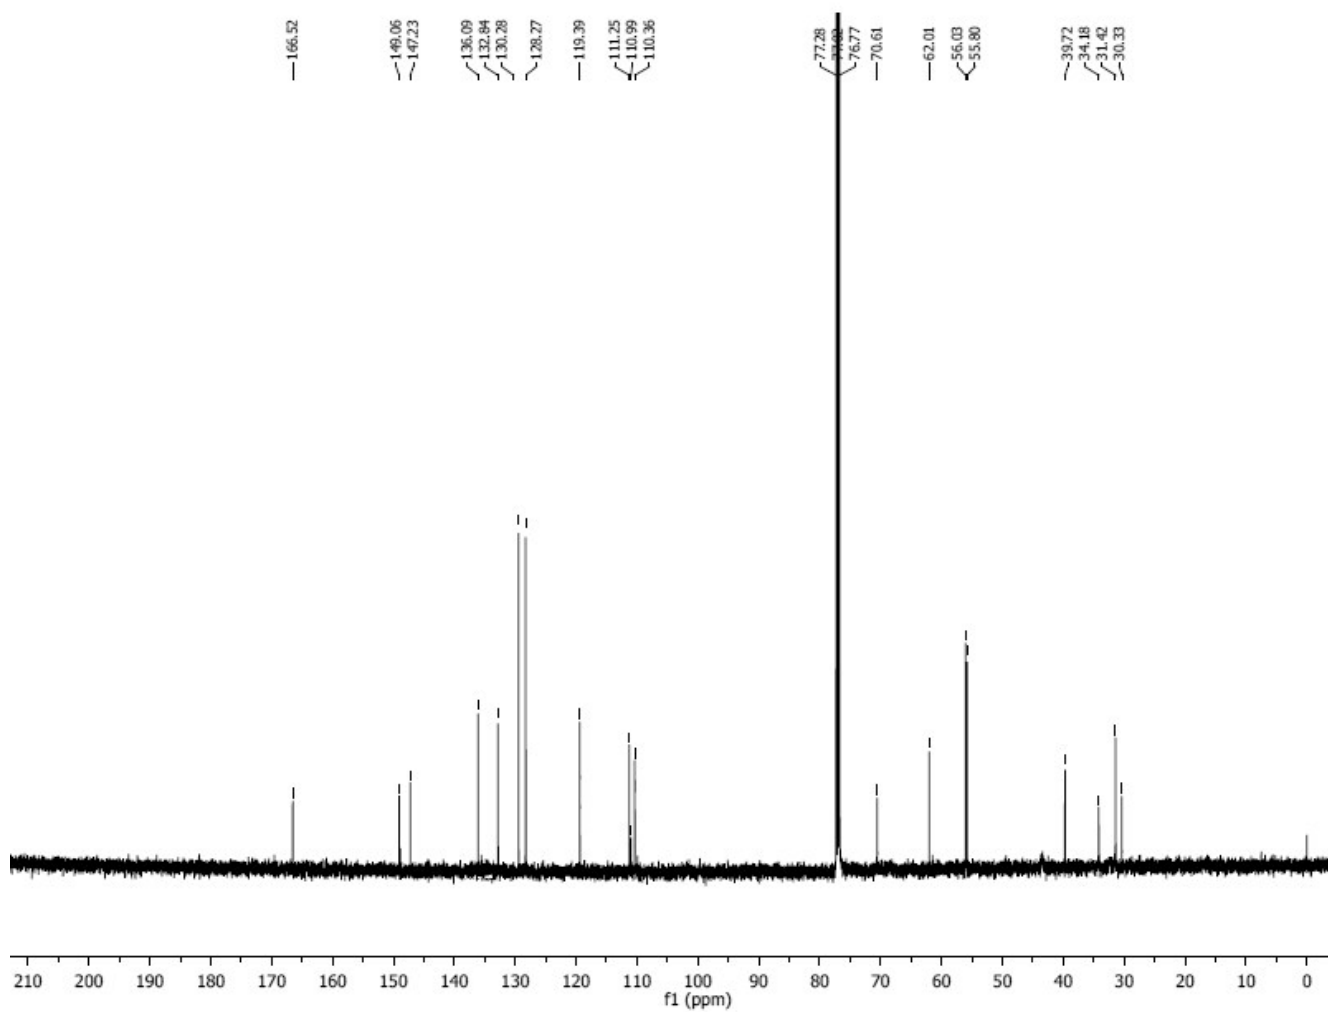

**$^{13}\text{C}$ NMR of ( $\pm$ )-13 (126MHz,  $\text{CDCl}_3$ )**

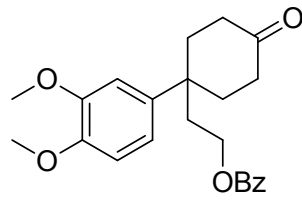

14

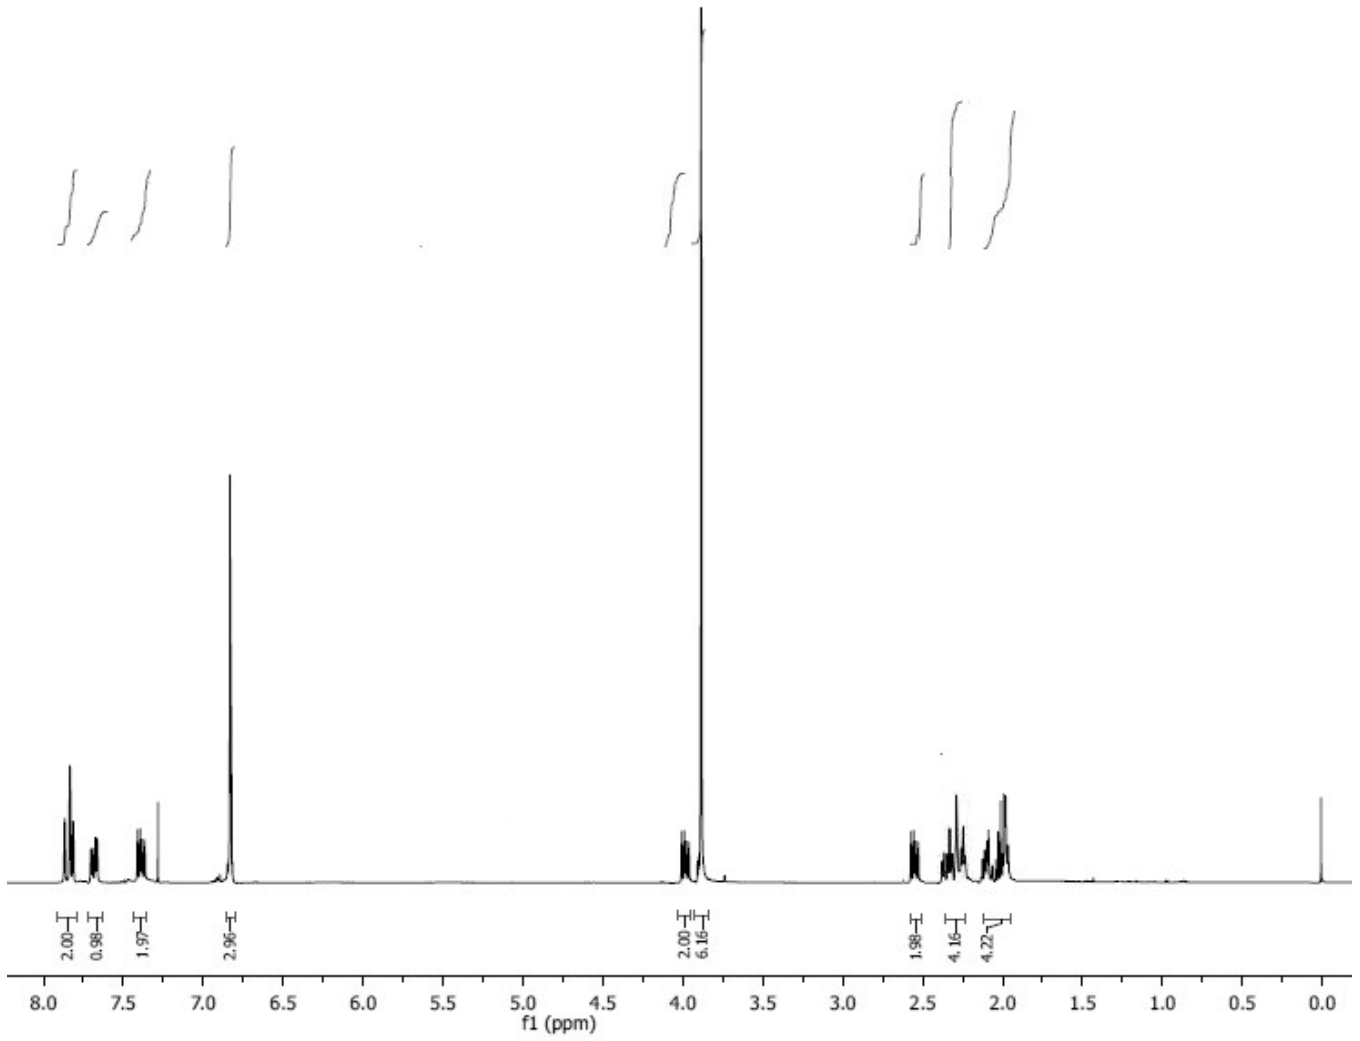

<sup>1</sup>H NMR of (±)-14 (500 MHz, CDCl<sub>3</sub>)

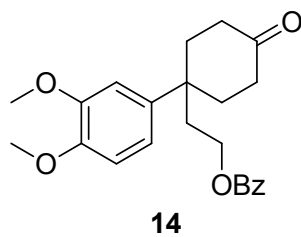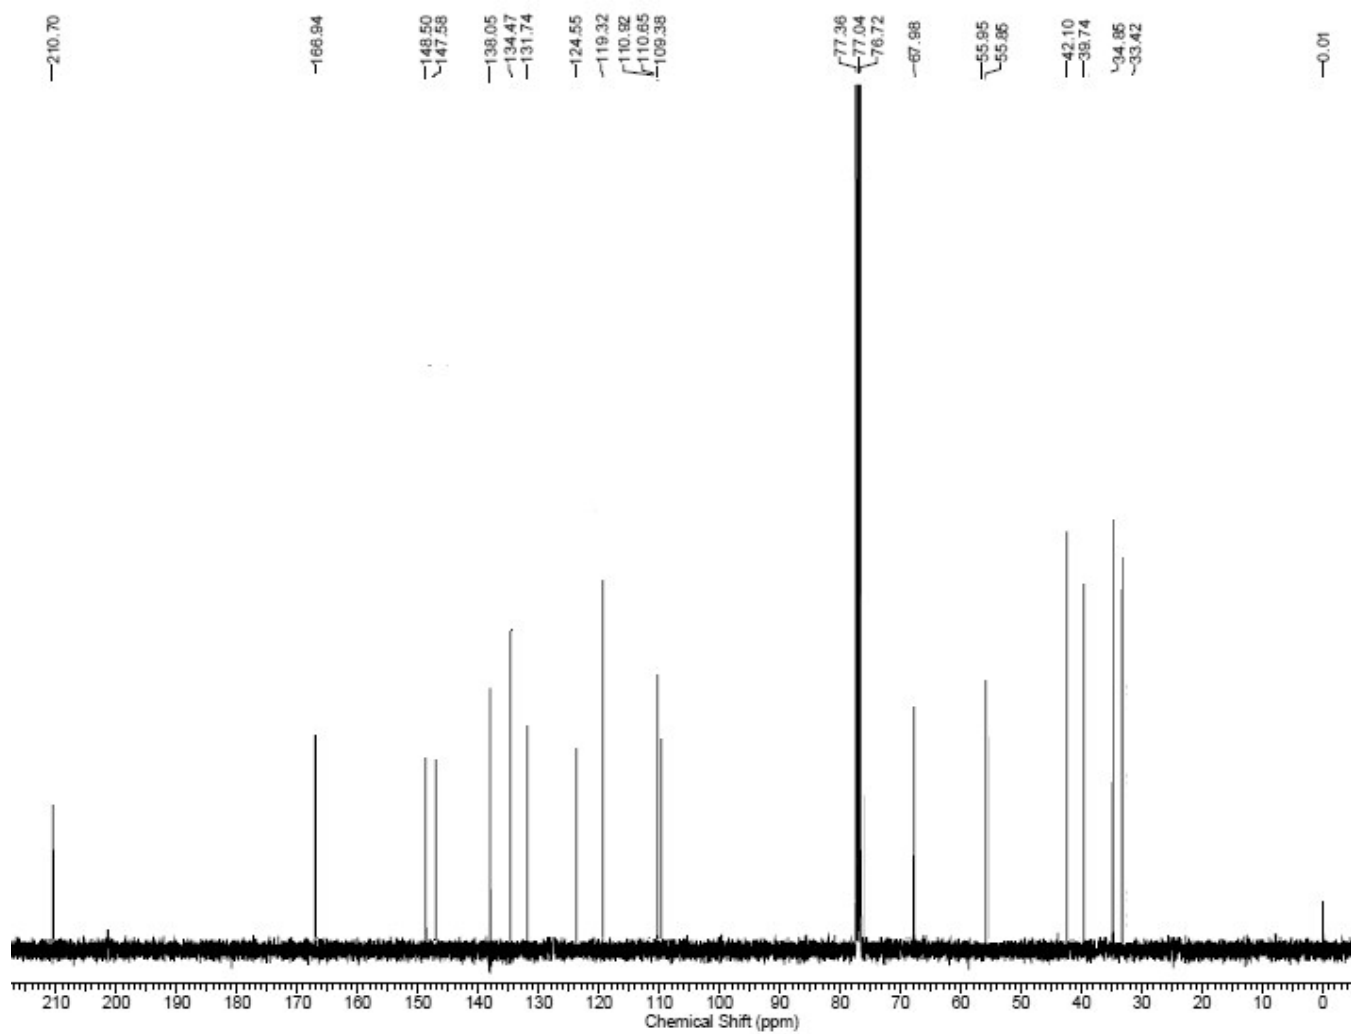

**<sup>13</sup>CNMR of (±)-14 (126MHz, CDCl<sub>3</sub>)**

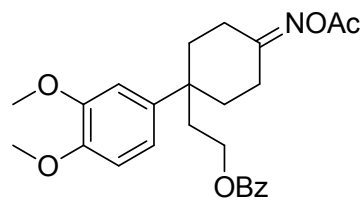

15

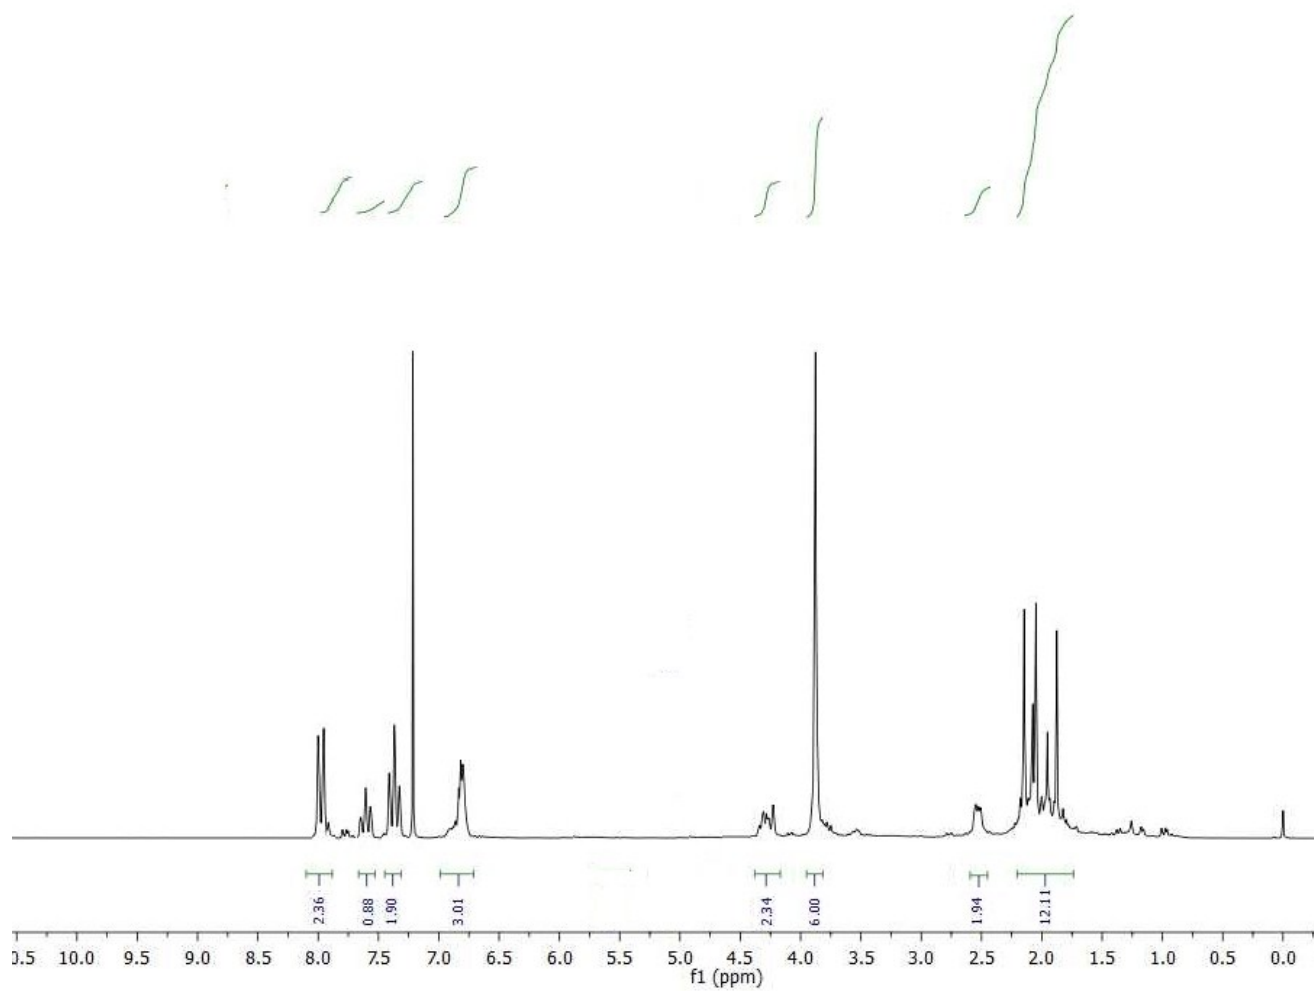

$^1\text{H}$  NMR of ( $\pm$ )-15 (500 MHz,  $\text{CDCl}_3$ )

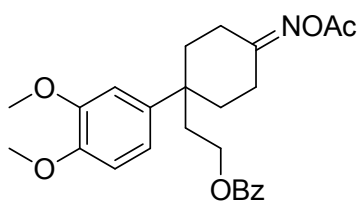

**15**

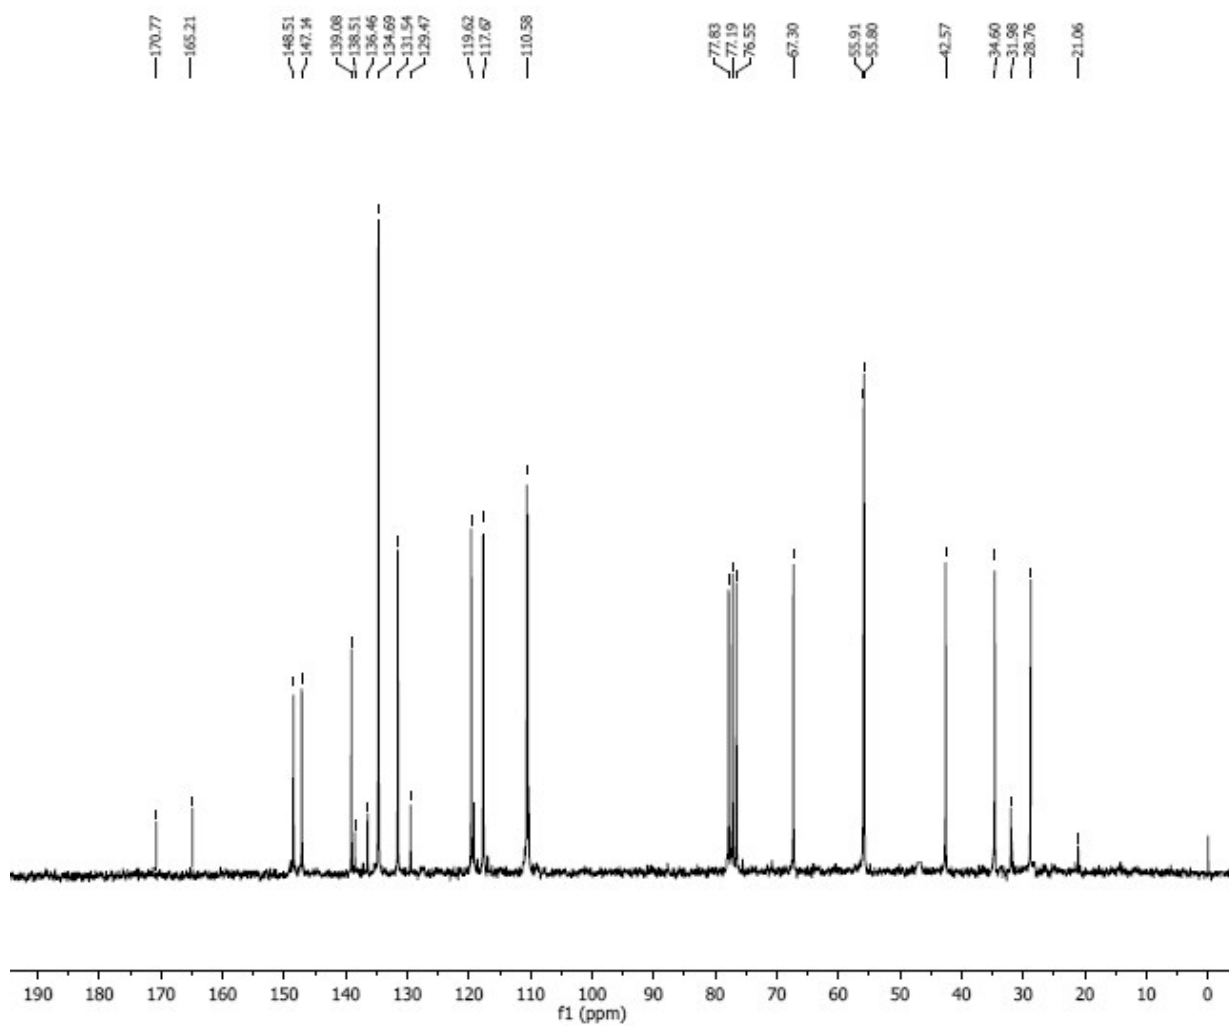

<sup>13</sup>CNMR of (±)-15 (126MHz, CDCl<sub>3</sub>)

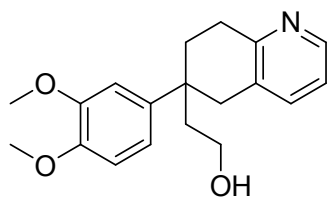

16

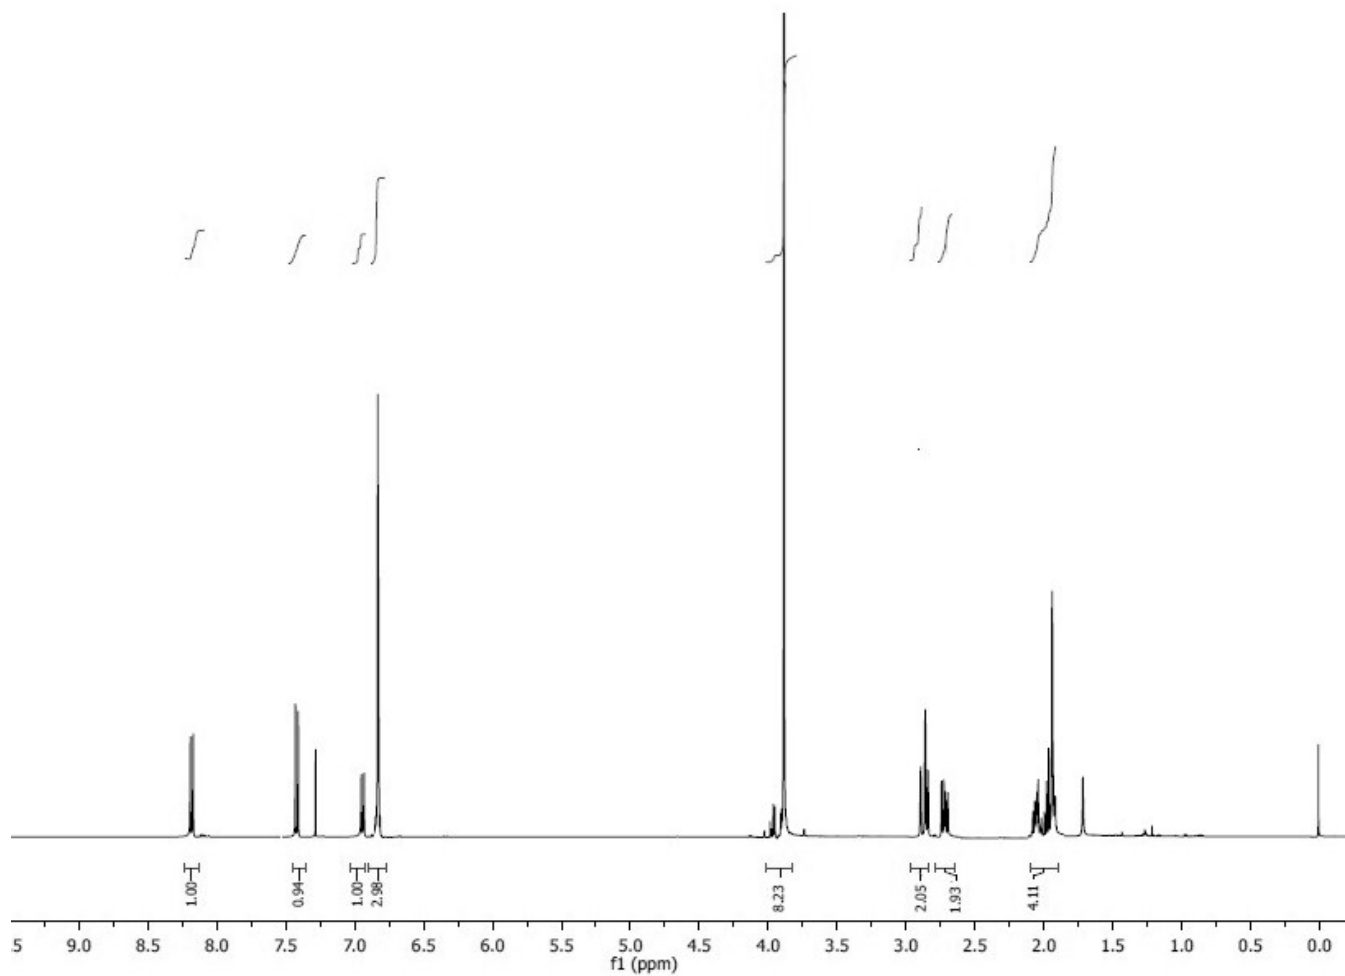

<sup>1</sup>H NMR of (±)-16 (500 MHz, CDCl<sub>3</sub>)



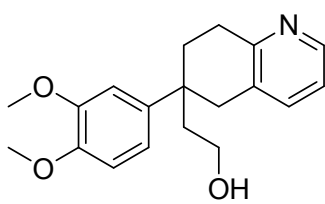

16

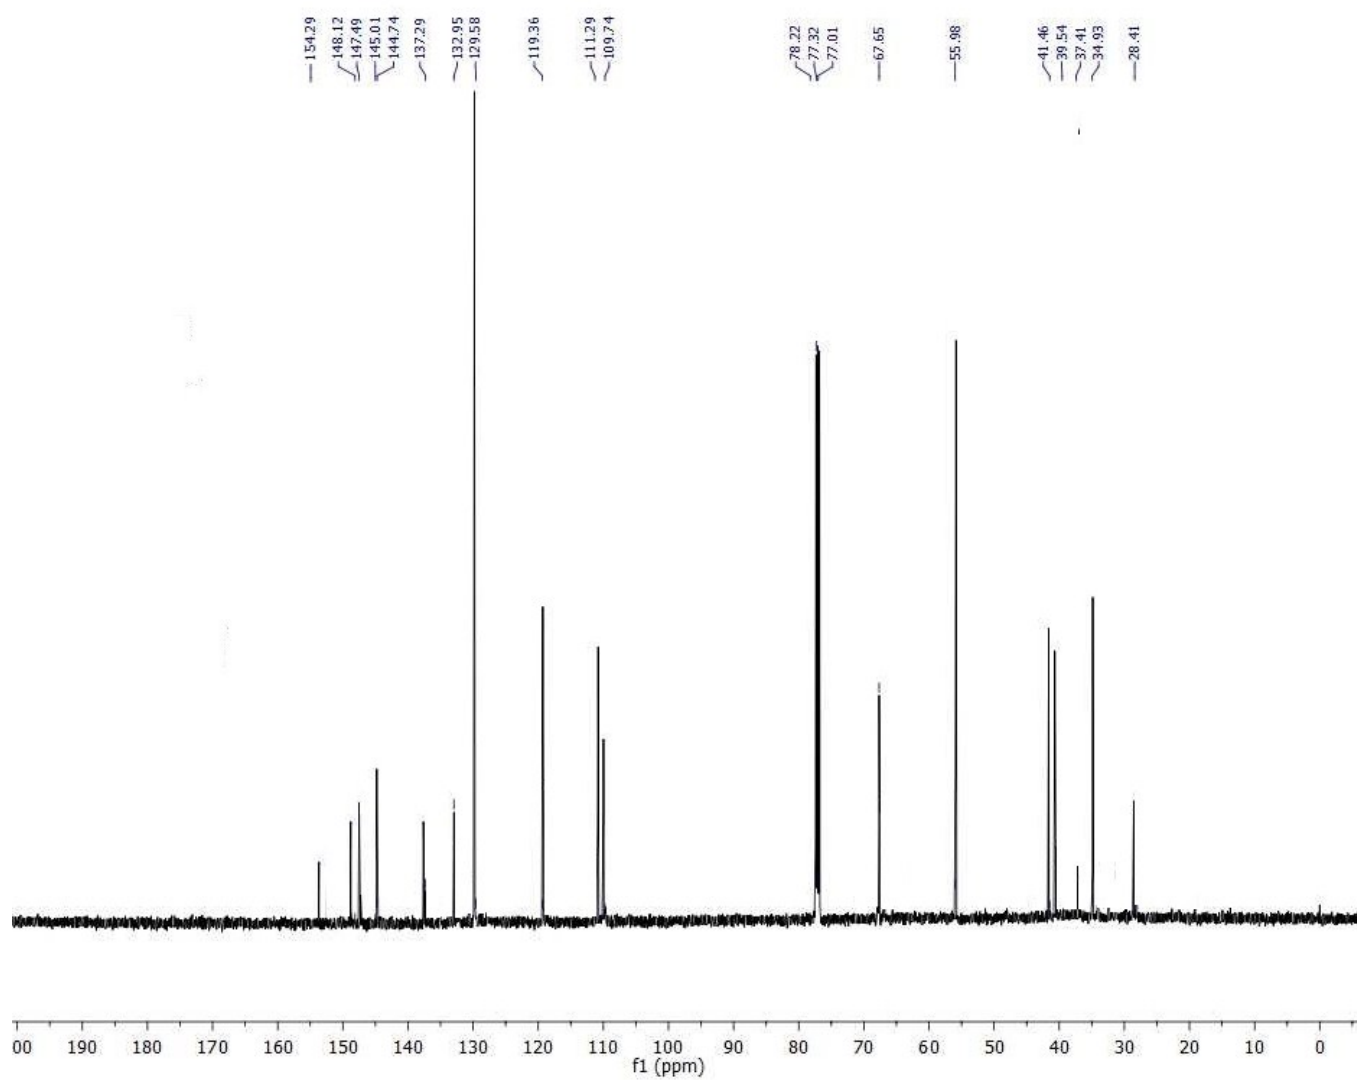

$^{13}\text{C}$  NMR of ( $\pm$ )-16 (126MHz,  $\text{CDCl}_3$ )

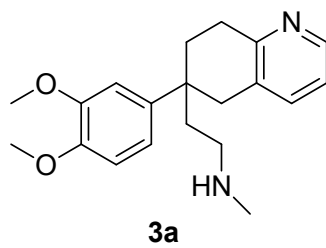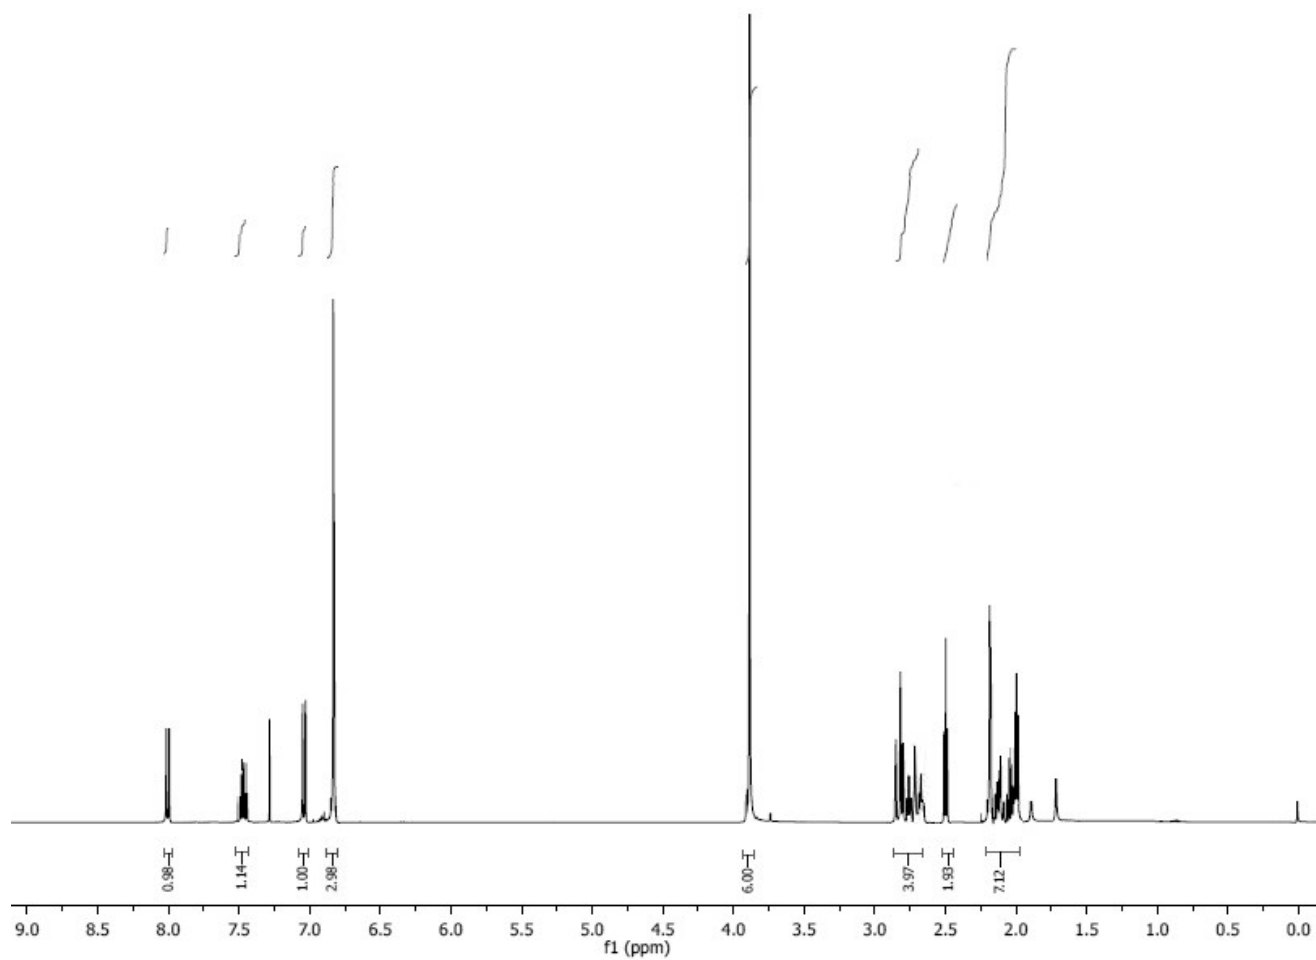

**<sup>1</sup>H NMR of (±)-tortuosamine3a (500 MHz, CDCl<sub>3</sub>)**

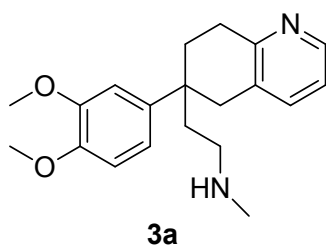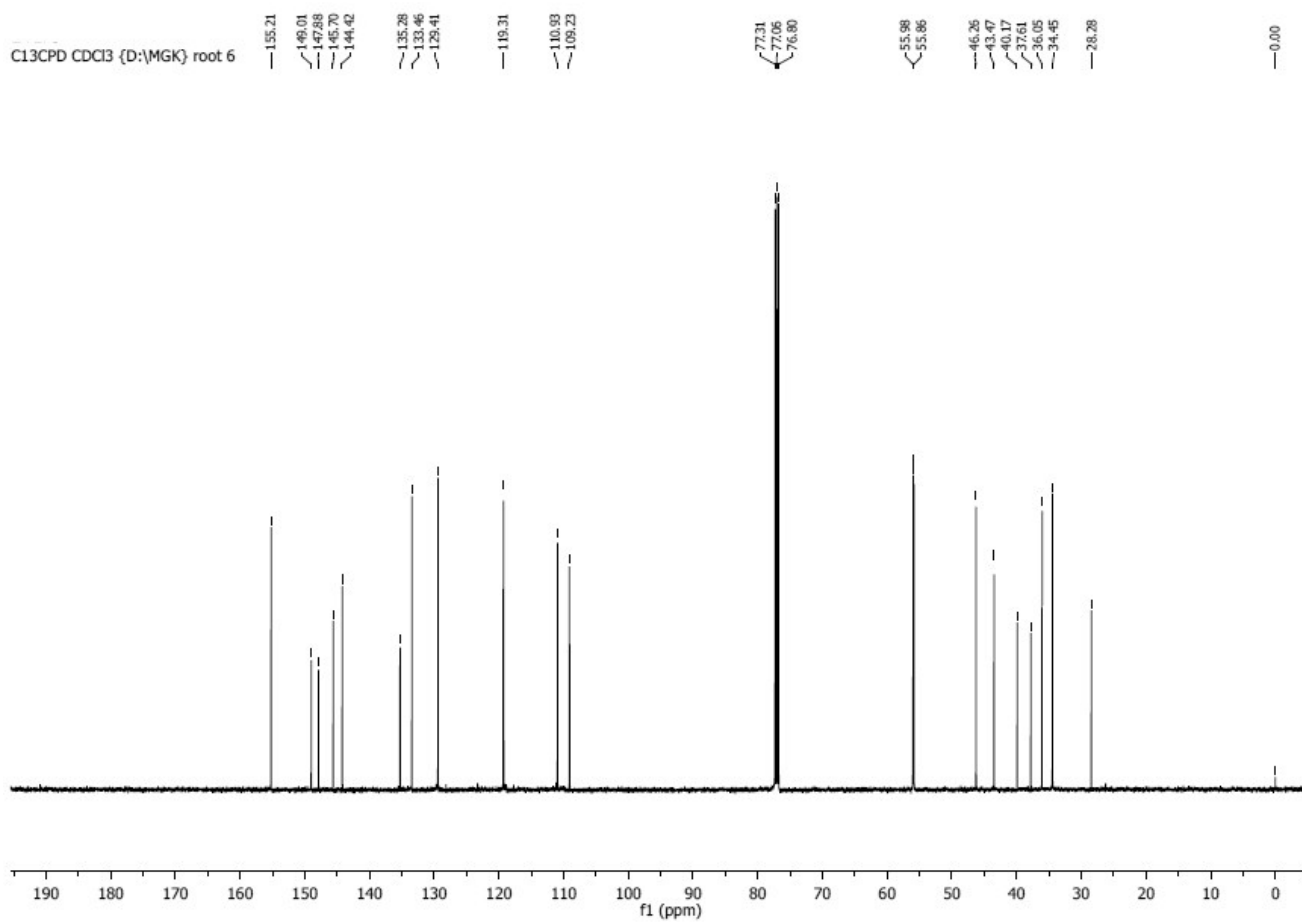

**<sup>13</sup>CNMR of (±)-tortuosamine 3a (126MHz, CDCl<sub>3</sub>)**

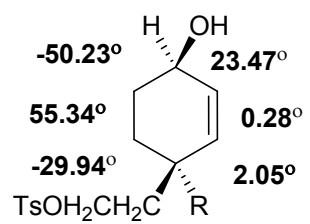

R = 3,4-dimethoxy benzene

**10a<sup>I</sup>**

Fig. 1 Dihedral angles of conformer 10a<sup>I</sup> obtained after the optimization by DFT

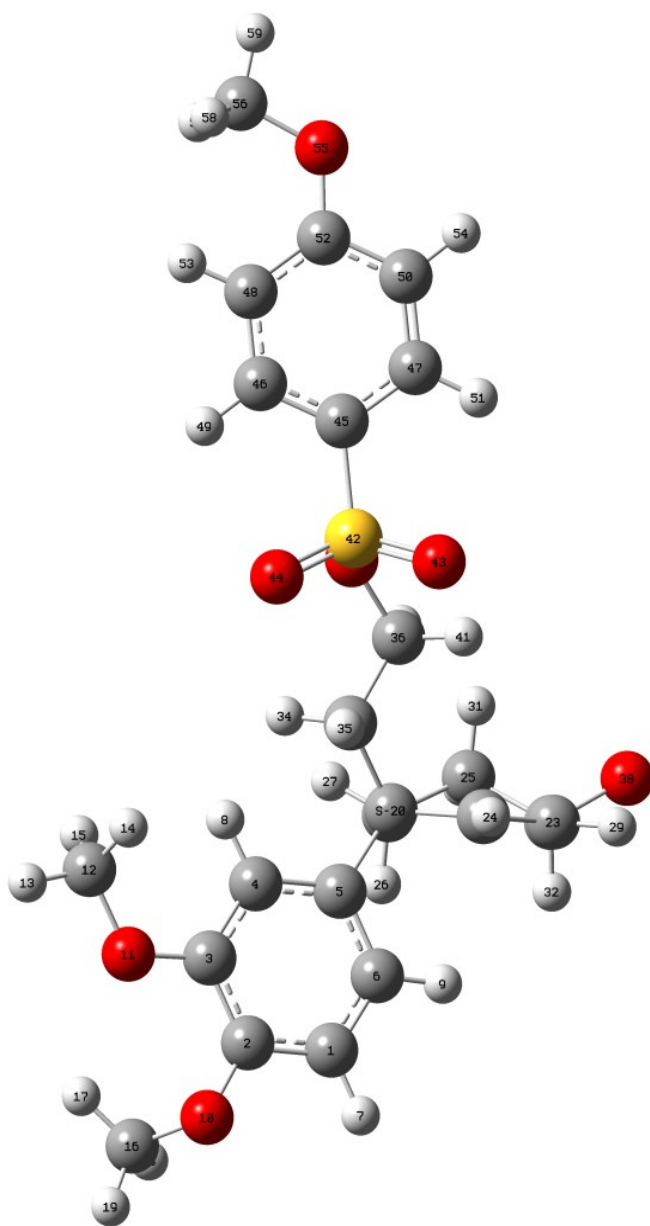

Fig. 2 DFT optimized structure of **10a<sup>I</sup>**

Table 1. Coordinates of **10a**<sup>1</sup> optimized structure by DFT

| Atom | X           | Y           | Z           |
|------|-------------|-------------|-------------|
| C    | -5.48353600 | -0.17264200 | -0.64366400 |
| C    | -5.37300500 | -1.52874400 | -0.36374100 |
| C    | -4.13180400 | -2.02993200 | 0.07194100  |
| C    | -3.05412500 | -1.15694200 | 0.24279000  |
| C    | -3.16777200 | 0.21320600  | -0.02975800 |
| C    | -4.40000900 | 0.68824300  | -0.48616500 |
| H    | -6.43746800 | 0.19415400  | -1.00509200 |
| H    | -2.11303700 | -1.56535300 | 0.57682000  |
| H    | -4.52009000 | 1.73734900  | -0.72805200 |
| O    | -6.44770200 | -2.34810700 | -0.60475000 |
| O    | -4.06517400 | -3.37635800 | 0.29122700  |
| C    | -2.80836800 | -3.95512200 | 0.62247400  |
| H    | -2.98737000 | -5.02680600 | 0.69391600  |
| H    | -2.06251100 | -3.76188800 | -0.15493900 |
| H    | -2.43679500 | -3.58612300 | 1.58479500  |
| C    | -7.03425300 | -2.97840500 | 0.53927700  |
| H    | -6.32769100 | -3.65258900 | 1.02723100  |
| H    | -7.38500000 | -2.22498800 | 1.25389200  |
| H    | -7.88612800 | -3.54616700 | 0.16580400  |
| C    | -2.00207000 | 1.20876500  | 0.20150900  |
| C    | -1.95000200 | 2.17028200  | -0.97617300 |
| C    | -2.28800500 | 1.98210000  | 1.53132100  |
| C    | -2.08325600 | 3.49392800  | -0.89970400 |
| H    | -1.79511700 | 1.70753500  | -1.94782500 |
| C    | -1.76291800 | 3.42513500  | 1.56985300  |
| H    | -3.37051700 | 2.01401900  | 1.68089200  |
| H    | -1.88586800 | 1.40951900  | 2.37312400  |
| C    | -2.30204300 | 4.23407300  | 0.38931600  |
| H    | -2.04112600 | 4.10640200  | -1.79528400 |
| H    | -2.06034300 | 3.89310900  | 2.51568400  |
| H    | -0.67200400 | 3.46743400  | 1.52358000  |
| H    | -3.38284900 | 4.40277100  | 0.52537100  |
| C    | -0.65544900 | 0.42870500  | 0.26182800  |
| H    | -0.65796500 | -0.23607400 | 1.12970600  |
| H    | -0.58605200 | -0.20524400 | -0.62647700 |
| C    | 0.61001700  | 1.27553400  | 0.34008300  |
| H    | 0.65333200  | 1.88108700  | 1.24334600  |
| O    | -1.65181200 | 5.50707500  | 0.26113100  |
| H    | -1.86007200 | 6.03570600  | 1.03840500  |
| O    | 1.79734900  | 0.43269300  | 0.47338500  |
| H    | 0.73201700  | 1.92115900  | -0.53004300 |
| S    | 2.34256100  | -0.36467300 | -0.85712900 |
| O    | 2.13399900  | 0.49776000  | -2.01650800 |
| O    | 1.79598400  | -1.71619500 | -0.84314800 |
| C    | 4.07332400  | -0.43521800 | -0.45400300 |
| C    | 4.57878200  | -1.55599300 | 0.19300100  |
| C    | 4.90332700  | 0.63778700  | -0.79254400 |
| C    | 5.93287400  | -1.61534100 | 0.51518200  |
| H    | 3.92175100  | -2.38224900 | 0.43283100  |
| C    | 6.24747300  | 0.58099500  | -0.47308600 |
| H    | 4.49605700  | 1.49626200  | -1.31165400 |
| C    | 6.77076800  | -0.54433400 | 0.18386300  |
| H    | 6.31820600  | -2.49394200 | 1.01349800  |
| H    | 6.91878100  | 1.39163000  | -0.72756700 |
| O    | 8.10001200  | -0.50123900 | 0.44842900  |
| C    | 8.71096700  | -1.60997000 | 1.10284300  |
| H    | 8.28150600  | -1.76973900 | 2.09692200  |
| H    | 8.61544100  | -2.52353700 | 0.50754700  |
| H    | 9.76317200  | -1.35035400 | 1.20083800  |
